# Supplementary material for: Facile synthesis of five-membered cyclic RE2P–H iron(0) complexes
Source: Royal Society of Chemistry journal article supplement (doi:10.1039/d4dt01313a), 2024-01-01
Supplement: d4dt01313a1.pdf [file d4dt01313a1.pdf]

## Electronic Supporting Information:

### Facile synthesis of five-membered cyclic RE<sub>2</sub>P–H iron(0) complexes

P. C. Brehm, G. Schnakenburg, R. Streubel\*

Institute of Inorganic Chemistry, Rheinische Friedrich-Wilhelms-Universität Bonn,  
Gerhard-Domagk-Straße 1, 53121 Bonn, Germany.  
E-mail: r.streubel@uni-bonn.de.

#### Table of contents

|                                                                                                                                                                                                                                |    |
|--------------------------------------------------------------------------------------------------------------------------------------------------------------------------------------------------------------------------------|----|
| General working methods: .....                                                                                                                                                                                                 | 2  |
| Experimental protocols: .....                                                                                                                                                                                                  | 2  |
| General procedure for the (attempted) reduction of chloro phosphanes <b>1a,2a,3b</b> : .....                                                                                                                                   | 2  |
| Synthesis of [tetracarbonyl(2-chloro-1,3-dimethyl-1,3,2-diazaphospholidine-κP)iron(0)] <b>1b</b> <sup>Fe</sup> : .....                                                                                                         | 3  |
| Synthesis of [tetracarbonyl(2-chloro-4,5-dimethyl-1,3,2-dioxaphospholane-κP)iron(0)] <b>3b</b> <sup>Fe</sup> and<br>[tetracarbonyl(2-chloro-2H-benzo[4,5-c]-1,3,2-dioxaphospholane-κP)iron(0)] <b>3c</b> <sup>Fe</sup> : ..... | 3  |
| 1,3,2-Diazaphospholidine Fe(CO) <sub>4</sub> complexes: .....                                                                                                                                                                  | 4  |
| Synthesis of [tetracarbonyl(1,3-di(1-methylethyl)-1,3,2-diazaphospholidine-κP)iron(0)] <b>4a</b> <sup>Fe</sup> : ..                                                                                                            | 4  |
| Synthesis of [tetracarbonyl(1,3-dimethyl-1,3,2-diazaphospholidine-κP)iron(0)] <b>4b</b> <sup>Fe</sup> : .....                                                                                                                  | 4  |
| Synthesis of [tetracarbonyl(1,3-dimethyl-1H-benzo[4,5-c]-2,3-dihydro-1,3,2-diazaphosphole-<br>κP)iron(0)] <b>4c</b> <sup>Fe</sup> : .....                                                                                      | 5  |
| 1,3,2-Oxazaphospholidine Fe(CO) <sub>4</sub> complexes: .....                                                                                                                                                                  | 5  |
| Synthesis of [tetracarbonyl(3-(1-methylethyl)-1,3,2-oxazaphospholidine-κP)iron(0)] <b>5a</b> <sup>Fe</sup> : .....                                                                                                             | 5  |
| Synthesis of [tetracarbonyl(3-methyl-1,3,2-oxazaphospholidine-κP)iron(0)] <b>5b</b> <sup>Fe</sup> : .....                                                                                                                      | 6  |
| Synthesis of [tetracarbonyl(4,4,5,5-tetramethyl-1,3,2-dioxaphospholane-κP)iron(0)] <b>6b</b> <sup>Fe</sup> : .....                                                                                                             | 6  |
| Synthesis of [tetracarbonyl(benzo[4,5-c]-1H-2,3-dihydro-1,3,2-dioxaphosphole-κP)iron(0)]<br><b>6c</b> <sup>Fe</sup> : .....                                                                                                    | 7  |
| Synthesis of triethylammonium[tetracarbonyl([2-hydroxy-phenoxy]-phosphinito-<br>κP)ferrate(0)] <b>7</b> : .....                                                                                                                | 7  |
| References .....                                                                                                                                                                                                               | 7  |
| NMR Spectra of .....                                                                                                                                                                                                           | 8  |
| <b>1b</b> <sup>Fe</sup> .....                                                                                                                                                                                                  | 8  |
| <b>3b</b> <sup>Fe</sup> .....                                                                                                                                                                                                  | 10 |
| <b>3c</b> <sup>Fe</sup> .....                                                                                                                                                                                                  | 11 |
| <b>4a</b> <sup>Fe</sup> .....                                                                                                                                                                                                  | 13 |
| <b>4b</b> <sup>Fe</sup> .....                                                                                                                                                                                                  | 14 |
| <b>4c</b> <sup>Fe</sup> .....                                                                                                                                                                                                  | 16 |
| <b>5a</b> <sup>Fe</sup> .....                                                                                                                                                                                                  | 17 |

|                                                   |    |
|---------------------------------------------------|----|
| <b>5b<sup>Fe</sup></b> .....                      | 19 |
| <b>6b<sup>Fe</sup></b> .....                      | 20 |
| <b>6c<sup>Fe</sup></b> .....                      | 22 |
| <b>7</b> .....                                    | 23 |
| Single crystal X-ray diffraction studies of ..... | 25 |
| <b>1b<sup>Fe</sup></b> .....                      | 25 |
| <b>4c<sup>Fe</sup></b> .....                      | 26 |
| <b>6c<sup>Fe</sup></b> .....                      | 27 |

### General working methods:

All reactions were performed, if not stated otherwise under dried and deoxygenated argon atmosphere using Schlenk or glovebox techniques. The used argon (>99.998%) was purified by a system of three columns (deoxygenation by a BTS copper catalyst (BASF PuriStarR R3-15S) at ca. 100 °C, removing moisture with silica gel, phosphorus pentoxide desiccant with indicator (Sicapent®) and calcium chloride). glassware, spatulae, cannulae as well as filter papers were dried in a compartment dryer at 110 °C for at least one hour. Additionally, the glassware was heated with a Teclu burner (up to 1600 °C) or if sensitive with heat gun (up to 550 °C) under active vacuum (<0.03 mbar) flushed with argon and the kept under vacuum for min. 5 to 10 minutes. Sterile syringes were purged with argon three times before use. The solvents were dried by standard procedures by refluxing over proper desiccants under an argon atmosphere (n-pentane, petroleum ether 40/65 and toluene over sodium wire (o = 2 mm); diethyl ether stabilized with 3,5-di-tertbutyl-4-hydroxytoluene (BHT) and tetrahydrofuran over benzophenone and sodium wire) for several days and distilled before use. Alternatively, diethyl ether and toluene were dried using a Mbraun SPS-800 solvent purification system. Transfer of solvents or solutions was achieved by the use of stainless steel cannulae (o = 2 mm and 4 mm) connecting two glass vessels, one of which was under argon overpressure and the other had a vent (commonly a cannula was used) to the atmosphere. For filtration Schlenk frits or stainless steel cannulae (o = 1 mm and 2 mm) with Whatman® Cytiva grade 595 cellulose filter paper or for finer residues Whatman® glass microfiber filters (grade gF/B) or were used. After use, cannulas made of stainless steel were cleaned with acetone, water and diluted hydrochloric acid and glassware by storage in a concentrated solution of potassium hydroxide in <sup>1</sup>PrOH for at least two days (in the case of glass frits only overnight) and in diluted hydrochloric acid for several hours. Afterwards, the glassware was washed with water, subsequently with demineralised water and acetone. glass joints were greased with OKS 1112 grease or with PTFE paste (Carl Roth).

The chloro phosphanes **1a,b,c**, **2a,b** and **3b,c** were synthesised according to literature procedures.<sup>1-4</sup> N,N'-dimethyl-ethylenediamine, N,N'-diisopropyl-ethylenediamine, N-methyl- and N-isopropyl ethanolamine, pinacol and catechol were purchased and used as received. 1,2-Dimethylaminobenzene was prepared fresh following a reported procedure.<sup>5</sup> K[Fe(CO)<sub>4</sub>H] was synthesised from Fe(CO)<sub>5</sub> following literature procedures and kept as a solid in the freezer (-40°C) until usage.<sup>6</sup>

### Experimental protocols:

General procedure for the (attempted) reduction of chloro phosphanes **1a,2a,3b**:

**Method 1)** In a Schlenk tube the phosphane (0.6 mmol, 1 eq.) was dissolved in 2 mL Et<sub>2</sub>O. In another Schlenk tube a suspension of Li[AlH<sub>4</sub>] (0.9 mmol, 1.5 eq) in 3 mL Et<sub>2</sub>O was prepared. The Li[AlH<sub>4</sub>]

suspension was added slowly with a transfer canula to the phosphane solution under constant stirring. After complete addition the canula was rinsed with 1 mL Et<sub>2</sub>O.

**Method 2)** In a Schlenk tube the phosphane (0.7 mmol, 1 eq.) was dissolved in 3 mL THF. While stirring 0.7 mL (0.7 mL, 1 eq.) of a Li-selectride solution in THF (c = 1 M) were added to the solution.

Synthesis of [tetracarbonyl(2-chloro-1,3-dimethyl-1,3,2-diazaphospholidine-κP)iron(0)] **1b**<sup>Fe</sup>:

**1b**<sup>Fe</sup>: In a 250 mL Schlenk flask 2.25 g (6 mmol, 1 eq.) Fe<sub>2</sub>(CO)<sub>9</sub> were suspended in 85 mL THF at 0 °C. In a 50 mL Schlenk tube 1.01 g (7 mmol, 1.1 eq.) **1b** were dissolved in 10 mL THF at 0 °C and then added to the Fe<sub>2</sub>(CO)<sub>9</sub> suspension with a syringe. After the addition the syringe was rinsed twice with 2.5 mL THF. Then the ice bath was removed and the dark red mixture was stirred for 2.5 hours at room temperature after which the solvent was removed. The product was then sublimed from the crude residue on a cold finger at 0 °C under a pressure of 8·10<sup>-2</sup> mbar. The yield could be increased if the Schlenk flask was heated to 40 °C and the pressure was reduced to 4·10<sup>-2</sup> mbar. The product was obtained as yellow needles in moderate yields.

**Yield:** 820 mg, 39%; **Melting point:** 69 °C; **Elemental analysis:** calculated (%) C 29.99 H 3.15 N 8.74 , found (%) C 30.00 H 3.33 N 8.55; **MS:** (EI, 70 eV, selected data): m/z = 558.0 [2M-Cl-CO+O]<sup>+</sup>, 530.0 [2M-Cl-2CO+O]<sup>+</sup>, 502.0 [2M-Cl-3CO+O]<sup>+</sup>, 474.0 [2M-Cl-4CO+O]<sup>+</sup>, 418.0 [2M-Cl-6CO+O]<sup>+</sup>, 362.1 [2M-Cl-8CO+O]<sup>+</sup>, 306.1 [2M-Cl-8CO-Fe+O]<sup>+</sup>, 318.9 [M-H]<sup>+</sup>, 285.0 [M-Cl]<sup>+</sup>, 257.0 [M-Cl-CO]<sup>+</sup>, 229.0 [M-Cl-2CO]<sup>+</sup>, 201.0 [M-Cl-3CO]<sup>+</sup>, 117.1 [M-Cl-Fe-4CO]<sup>+</sup>; **IR** (ATR diamond) in cm<sup>-1</sup>: 2859 (w, ν (C-H)), 2058 (s, ν (C=O)), 1978 (w, ν (C=O)), 1928(vs, ν (C=O)); **<sup>1</sup>H-NMR:** (400 MHz, 298 K, THF-d<sub>8</sub>): 3.45 - 3.34 (m, 2H, C<sub>2</sub>H<sub>4</sub>), 3.28 - 3.22 (m, 2H, C<sub>2</sub>H<sub>4</sub>), 2.84 (d, <sup>3</sup>J<sub>P,H</sub> = 16.9 Hz, 6H, N-CH<sub>3</sub>). **<sup>13</sup>C{<sup>1</sup>H}-NMR:** (101 MHz, 298 K, THF-d<sub>8</sub>): 213.4 (d, = 20 Hz, CO), 51.3 (d, = 6 Hz, N-CH<sub>3</sub>), 33.0 (d, = 8 Hz, C<sub>2</sub>H<sub>4</sub>); **<sup>31</sup>P-NMR:** (203 MHz, 298 K, THF-d<sub>8</sub>): 182.0 (s<sub>sat</sub>, <sup>1</sup>J<sub>Fe,P</sub> = 47 Hz).

Synthesis of [tetracarbonyl(2-chloro-4,5-dimethyl-1,3,2-dioxaphospholane-κP)iron(0)] **3b**<sup>Fe</sup> and [tetracarbonyl(2-chloro-2H-benzo[4,5-c]-1,3,2-dioxaphospholane-κP)iron(0)] **3c**<sup>Fe</sup> :

**3b**<sup>Fe</sup>: In a 250 mL Schlenk flask 99 mg (0.3 mmol, 1 eq.) Fe<sub>2</sub>(CO)<sub>9</sub> were suspended in 2.5 mL THF at 0 °C. In a 50 mL Schlenk tube 51 mg (0.3 mmol, 1 eq.) **3b** were dissolved in 2.5 mL THF at 0 °C and then added to the Fe<sub>2</sub>(CO)<sub>9</sub> suspension with a transfer canula. After the addition the canula was rinsed twice with 1.5 mL THF. Then the ice bath was removed and the orange mixture was stirred for 1.5 hours at room temperature after which the solvent was removed. An almost quantitative conversion was observed by <sup>31</sup>P{<sup>1</sup>H}-NMR spectroscopy.

**Conversion:** >95% (estimated from <sup>31</sup>P{<sup>1</sup>H}-NMR); **<sup>1</sup>H-NMR:** (400 MHz, 298 K, THF-d<sub>8</sub>): 1.39 (s, 6H, 2xCH<sub>3</sub>), 1.30 (s, 6H, 2xCH<sub>3</sub>); **<sup>13</sup>C{<sup>1</sup>H}-NMR:** (126 MHz, 298 K, THF-d<sub>8</sub>): 211.3 (d, <sup>2</sup>J<sub>P,C</sub> = 22 Hz, CO), 92.5 (d, <sup>2</sup>J<sub>P,C</sub> = 7.1 Hz, Me<sub>2</sub>C-O), 25.2 (d, <sup>2</sup>J<sub>P,C</sub> = 6 Hz, -CH<sub>3</sub>), 24.5 (d, <sup>2</sup>J<sub>P,C</sub> = 3 Hz, -CH<sub>3</sub>); **<sup>31</sup>P-NMR:** (162 MHz, 298 K, THF-d<sub>8</sub>): 202.6 (s<sub>sat</sub>, <sup>1</sup>J<sub>Fe,P</sub> = 55 Hz).

**3c**<sup>Fe</sup>: In a 250 mL Schlenk flask 2.54 g (7 mmol, 1 eq.) Fe<sub>2</sub>(CO)<sub>9</sub> were suspended in 30 mL THF at 0 °C. In a 50 mL Schlenk tube 1.51 g (9 mmol, 1.2 mmol) **3c** were dissolved in 50 mL THF at 0 °C and then added to the Fe<sub>2</sub>(CO)<sub>9</sub> suspension with a transfer canula. After the addition the canula was rinsed twice with 10 mL THF. Then the ice bath was removed and the dark red mixture was stirred for 1.5 hours at room temperature after which the solvent was removed. The product was obtained in 95% conversion estimated from <sup>31</sup>P{<sup>1</sup>H}-NMR spectroscopy. Attempts to purify the crude product via common-work-up was not possible. Inert column chromatography (h = 4 cm, o = 1 cm, Al<sub>2</sub>O<sub>3</sub>, PE, -20 °C) allowed the isolation of **3c**<sup>Fe</sup>, however, in negligible amounts. Vacuum distillation (Oil bath: 140 °C, Thermometer:

N.A., Pressure:  $5 \cdot 10^{-3}$  mbar) also allowed the isolation of **3c<sup>Fe</sup>** as an orange oil, but also in this case only small amounts (less than a drop) were obtained as decomposition occurs at these temperatures.

**Conversion:** 94% (estimated from  $^{31}\text{P}\{^1\text{H}\}$ -NMR); **Yield:** — ; **MS:** (EI, 70 eV, selected data):  $m/z = 319.0$   $[\text{M}]^+$ , 313.9  $[\text{M}-\text{CO}]^+$ , 285.9  $[\text{M}-2\text{CO}]^+$ , 257.9  $[\text{M}-3\text{CO}]^+$ , 229.9  $[\text{M}-4\text{CO}]^+$ , 139.0  $[\text{M}-\text{Fe}-4\text{CO}-\text{Cl}]^+$ ;  **$^1\text{H}$ -NMR:** (300 MHz, 298 K,  $\text{C}_6\text{D}_6$ ): 6.66 (m, 2H, benzo), 6.53 (m, 2H, benzo);  **$^{13}\text{C}\{^1\text{H}\}$ -NMR:** (76 MHz, 298 K,  $\text{C}_6\text{D}_6$ ): 210.6 (d, = 16 Hz, CO), 145.4 (d, = 8 Hz, benzo ( $\text{C}^{\text{ipso-O}}$ )), 124.8 (s, benzo ( $\text{C}^{\text{meta}}$ )), 113.5 (d, = 7 Hz, benzo ( $\text{C}^{\text{ortho}}$ ));  **$^{31}\text{P}$ -NMR:** (122 MHz, 298 K,  $\text{C}_6\text{D}_6$ ): 210.5 ( $s_{\text{sat}}$ ,  $^1J_{\text{Fe,P}} = 74$  Hz).

1,3,2-Diazaphospholidine  $\text{Fe}(\text{CO})_4$  complexes:

Synthesis of [tetracarbonyl(1,3-di(1-methylethyl)-1,3,2-diazaphospholidine- $\kappa\text{P}$ )iron(0)] **4a<sup>Fe</sup>**:

In a 100 mL Schlenk flask 1.35 g (6 mmol, 1 eq.)  $\text{K}[\text{Fe}(\text{CO})_4\text{H}]$  were dissolved in 30 mL THF at 0 °C. In a 25 mL Schlenk tube 1.09 g (5 mmol, 0.8 eq.) **1a** were dissolved in 25 mL THF at 0 °C and then added to the  $\text{K}[\text{Fe}(\text{CO})_4\text{H}]$  suspension with a transfer canula. After the addition the canula was rinsed with 10 mL THF. Then the ice bath was removed and the yellow-brown mixture was stirred for 1.5 hours at room temperature after which the solvent was removed. The crude product was extracted from the residue with 50 mL (30+10+10 mL) *n*-pentane and the filtrate was dried to become a red oil. After further purification via inert column chromatography ( $h = 11$  cm,  $\phi = 4.5$  cm,  $\text{SiO}_2$  PE (2.5%  $\text{NEt}_3$ ), -20 °C) from which the first fraction (PE, 2.5%  $\text{NEt}_3$ ) contained product. After removal of solvent and drying under reduced pressure ( $3 \cdot 10^{-2}$  mbar) the product was obtained as a red-orange oil in moderate yield.

**Yield:** 1.63 g, 67%; **Elemental analysis:** calculated (%) C 42.13 H 5.60 N 8.11, found (%) C 41.83 H 5.65 N 8.14; **MS:** (EI, 70 eV, selected data):  $m/z = 342.0$   $[\text{M}]^{+*}$ , 314.0  $[\text{M}-\text{CO}]^{+*}$ , 286.0  $[\text{M}-2\text{CO}]^{+*}$ , 258.0  $[\text{M}-3\text{CO}]^{+*}$ , 230.0  $[\text{M}-4\text{CO}]^{+*}$ , 173.1  $[\text{M}-\text{Fe}-4\text{CO}-\text{H}]^{+*}$ ; **IR** (ATR diamond)  $\tilde{\nu}$  in  $\text{cm}^{-1}$ : (2970, 2934, 2872) (m,  $\nu(\text{C}-\text{H})$ ), 2187 (w,  $\nu(\text{P}-\text{H})$ ), 2048 (vs,  $\nu(\text{C}=\text{O})$ ), 1971 (w,  $\nu(\text{C}=\text{O})$ ), 1919 (vs,  $\nu(\text{C}=\text{O})$ );  **$^1\text{H}$ -NMR:** (500 MHz, 298 K, THF- $d_8$ ): 7.84 (d,  $^1J_{\text{P,H}} = 344$  Hz, 1H), 3.92 (m, 2H,  $\text{C}_2\text{H}_4$ ), 3.24 (m, 2H,  $\text{C}_2\text{H}_4$ ), 1.23 (d,  $^3J_{\text{H,H}} = 6.5$  Hz, 6H,  $2x\text{CH}_3$ ), 1.15 (d,  $^3J_{\text{H,H}} = 6.5$  Hz, 6H,  $2x\text{CH}_3$ );  **$^{13}\text{C}\{^1\text{H}\}$ -NMR:** (125.78 MHz, 298 K, THF- $d_8$ ): 214.5 (d,  $^2J_{\text{P,C}} = 21$  Hz, CO), 46.1 (d,  $^2J_{\text{P,C}} = 9$  Hz,  $\text{C}_2\text{H}_4$ ), 42.3 (s,  $\text{CH}(\text{Me})_2$ ), 21.6 (d,  $^3J_{\text{P,C}} = 7$  Hz,  $\text{CH}_3$ ), 19.8 (d,  $^3J_{\text{P,C}} = 3$  Hz,  $\text{CH}_3$ );  **$^{31}\text{P}\{^1\text{H}\}$ -NMR:** (203 MHz, 298 K, THF- $d_8$ ): 124.4 ( $s_{\text{sat}}$ ,  $^1J_{\text{Fe,P}} = 30$  Hz);  **$^{31}\text{P}$ -NMR:** (203 MHz, 298 K, THF- $d_8$ ): 124.4 (dm,  $^1J_{\text{P,H}} = 344$  Hz).

Synthesis of [tetracarbonyl(1,3-dimethyl-1,3,2-diazaphospholidine- $\kappa\text{P}$ )iron(0)] **4b<sup>Fe</sup>**:

In a 500 mL Schlenk flask 4.06 g (20 mmol, 1 eq.)  $\text{K}[\text{Fe}(\text{CO})_4\text{H}]$  were dissolved in 180 mL THF at 0 °C. In a 100 mL Schlenk tube 3.12 g (20 mmol, 1 eq.) **1b** were dissolved in 40 mL THF at 0 °C and then added to the  $\text{K}[\text{Fe}(\text{CO})_4\text{H}]$  suspension with a transfer canula. After the addition the canula was rinsed twice with 10 mL THF. Then the ice bath was removed and the mixture was stirred for 1 hour at room temperature after which the solvent was removed. The crude product was extracted from the residue with 60 mL (30+15+15 mL) *n*-pentane and then the red filtrate was dried to become a red oil. After further purification via inert column chromatography ( $h = 10$  cm,  $\phi = 4.5$  cm,  $\text{SiO}_2$  PE (5%  $\text{NEt}_3$ ), -20 °C) from which the first fraction and also the second (PE:Et<sub>2</sub>O, 1:1 + 5%  $\text{NEt}_3$ ) contained product and were combined. After solvent removal under reduced pressure ( $3 \cdot 10^{-2}$  mbar) the product was obtained as a red oil in good yield.

**Yield:** 4.23 g, 76%; **Elemental analysis:** calculated (%) C 33.60 H 3.88 N 9.79, found (%) C 33.41 H 3.99 N 9.78; **MS:** (EI, 70 eV, selected data):  $m/z = 285.9$   $[\text{M}]^{+*}$ , 257.9  $[\text{M}-\text{CO}]^{+*}$ , 229.9  $[\text{M}-2\text{CO}]^{+*}$ , 201.9  $[\text{M}-3\text{CO}]^{+*}$ , 173.9  $[\text{M}-4\text{CO}]^{+*}$ , 117.0  $[\text{M}-\text{Fe}-4\text{CO}-\text{H}]^{+*}$ ; **IR:** (toluene solution) in  $\text{cm}^{-1}$  3027 (m, C-H), 2054 (s, P-H), 1980 (s(br) CO), 1944 (vs(br), CO);  **$^1\text{H}$ -NMR:** (500 MHz, 298 K, THF- $d_8$ ): 7.47 (d,  $^1J_{\text{P,H}} = 357$  Hz, 1H), 3.28 – 3.20 (m, 2H, backbone-  $\text{C}_2\text{H}_4$ ), 3.13 – 3.07 (m, 2H,  $\text{C}_2\text{H}_4$ ), 2.75 (d,  $^1J_{\text{P,H}} = 14.4$  Hz, 6H,  $2x\text{N-Me}$ )

**$^{13}\text{C}\{^1\text{H}\}$ -NMR:** (126 MHz, 298 K, THF- $d_8$ ): 214.02 (d,  $^2J_{\text{P,C}} = 21$  Hz, CO), 53.62 (d,  $=3$  Hz,  $\text{C}_2\text{H}_4$ ), 34.58 (d,  $=7$  Hz, N- $\text{CH}_3$ );  **$^{31}\text{P}\{^1\text{H}\}$ -NMR:** (162 MHz, 298 K, THF- $d_8$ ): 144.1 ( $s_{\text{sat}}$ ,  $^1J_{\text{Fe,P}} = 29$  Hz);  **$^{31}\text{P}$ -NMR:** (162 MHz, 298 K, THF- $d_8$ ): 144.0 (dm,  $^1J_{\text{P,H}} = 358$  Hz).

Synthesis of [tetracarbonyl(1,3-dimethyl-1H-benzo[4,5-c]-2,3-dihydro-1,3,2-diazaphosphole- $\kappa\text{P}$ )iron(0)] **4c<sup>Fe</sup>**:

In a three necked 250 mL round bottom flask, equipped with a dropping funnel and a vacuum adapter, 1.03 g (8 mmol, 1 eq.) freshly prepared 1,2-dimethylaminobenzene was dissolved in 10 mL  $\text{Et}_2\text{O}$  and 2.5 mL (18 mmol, 2.4 eq.)  $\text{NEt}_3$  were added. The dropping funnel was charged with 7.5 mL  $\text{Et}_2\text{O}$  and 0.7 mL (11 mmol, 1.4 mmol)  $\text{PCl}_3$ . The round bottom flask was cooled to 0 °C in an ice bath and the  $\text{PCl}_3$  solution was added dropwise to the diaminobenzene over the period of 20 minutes. After the addition was completed the dropping funnel was rinsed with 3 mL  $\text{Et}_2\text{O}$ . The mixture was stirred for 1.5 hours at 0 °C, after which the formed colourless suspension was filtered through a glass filter (P3) and the residue was washed four times (20+10+30+20 mL) with  $\text{Et}_2\text{O}$ . The solvent was removed from the filtrate under reduced pressure (100 mbar) at room temperature. And the residual colourless powder was suspended in 20 mL THF and added via a transfer canula to a cooled (0 °C) solution of 1.58 mg (8 mmol, 1 eq.)  $\text{K}[\text{Fe}(\text{CO})_4\text{H}]$  in 30 mL THF in a 100 mL Schlenk tube. After addition the canula was rinsed with 20 mL THF. The reaction mixture was stirred at room temperature for 30 minutes after which the solvent was removed under reduced pressure ( $3 \cdot 10^{-2}$  mbar). After thorough drying the product was extracted from the red residue with 100 mL *n*-pentane. Removal of the solvent under reduced pressure ( $3 \cdot 10^{-2}$  mbar) gives a red-brown powder in moderate yield. Further purification via column chromatography (h = 10 cm,  $\phi = 1$  cm,  $\text{SiO}_2$ , PE: $\text{Et}_2\text{O}$  (2.5%  $\text{NEt}_3$ ), -20 °C) is possible however leads to a decrease of the yield below 10%.

**Yield:** 1.52 g, 59%; **Melting point:** 131 °C; **Elemental analysis:** calculated (%) C 43.15 H 3.32 N 8.39, found (%) C 42.58 H 3.33 N 8.27; **MS:** (EI, 70 eV, selected data):  $m/z$  (%) 333.9 [ $\text{M}]^{+\bullet}$ , 305.9 [ $\text{M-CO}]^{+\bullet}$ , 277.9 [ $\text{M-2CO}]^{+\bullet}$ , 249.9 [ $\text{M-3CO}]^{+\bullet}$ , 249.9 [ $\text{M-3CO}]^{+\bullet}$ , 222.0 [ $\text{M-4CO}]^{+\bullet}$ , 182.0 [ $\text{M-4CO-Fe+O}]^{+\bullet}$  165 [ $\text{M-4CO-Fe-H}]^{+\bullet}$ ; **IR** (ATR diamond)  $\tilde{\nu}$  in  $\text{cm}^{-1}$ : 2932(m,  $\nu(\text{C-H})$ ), 2052 (m,  $\nu(\text{P-H})$ ), 2029 (m,  $\nu(\text{C=O})$ ), 1910 (vs,  $\nu(\text{C=O})$ );  **$^1\text{H}$ -NMR:** (300 MHz, 298 K, THF- $d_8$ ): 8.94 (d,  $^1J_{\text{P,H}} = 358.4$  Hz, 1H, P-H), 6.58 – 6.68 (m, 4H,  $\text{C}_6\text{H}_4$ ), 3.10 (d,  $^3J_{\text{P,H}} = 11.9$  Hz, 6H, N- $\text{CH}_3$ );  **$^{13}\text{C}\{^1\text{H}\}$ -NMR:** (76 MHz, 298 K, THF- $d_8$ ): 212.1 (d,  $^2J_{\text{P,C}} = 20$  Hz, CO), 138.8 (d,  $^XJ_{\text{P,C}} = 2$  Hz,  $\text{C}_6\text{H}_4$ ), 119.9 (s,  $\text{C}_6\text{H}_4$ ), 107.9 (d,  $^XJ_{\text{P,C}} = 5$  Hz,  $\text{C}_6\text{H}_4$ ), 28.0 (d,  $^2J_{\text{P,C}} = 9$  Hz, N- $\text{CH}_3$ );  **$^{31}\text{P}\{^1\text{H}\}$ -NMR:** (122 MHz, 298 K, THF- $d_8$ ): 151.8 ( $s_{\text{sat}}$ ,  $^1J_{\text{Fe,P}} = 33$  Hz)  **$^{31}\text{P}$ -NMR:** (122 MHz, 298 K, THF- $d_8$ ): 151.8 (dhept,  $^1J_{\text{P,H}} = 356$  Hz,  $^3J_{\text{P,H}} = 12$  Hz).

1,3,2-Oxazaphospholidine  $\text{Fe}(\text{CO})_4$  complexes:

Synthesis of [tetracarbonyl(3-(1-methylethyl)-1,3,2-oxazaphospholidine- $\kappa\text{P}$ )iron(0)] **5a<sup>Fe</sup>**:

In a 100 mL Schlenk flask 1.47 g (7 mmol, 1 eq.)  $\text{K}[\text{Fe}(\text{CO})_4\text{H}]$  were dissolved in 20 mL THF at 0 °C. In a 25 mL Schlenk tube 1.03 g (6 mmol, 0.9 eq.) **2a** were dissolved in 10 mL THF at 0 °C and then added to the  $\text{K}[\text{Fe}(\text{CO})_4\text{H}]$  suspension with a transfer canula. After the addition the canula was rinsed with 5 mL THF. Then the ice bath was removed and the yellow-brown mixture was stirred for 18 hours at room temperature after which the solvent was removed. The crude product was extracted from the residue with 40 mL (20+10+10 mL) *n*-pentane and the filtrate was dried to become a red oil. After further purification via inert column chromatography (h = 11 cm,  $\phi = 4.5$  cm,  $\text{SiO}_2$  PE (2.5%  $\text{NEt}_3$ ), -20 °C) from which the first fraction (PE, 2.5%  $\text{NEt}_3$ ) contained product. After removal of solvent and drying under reduced pressure ( $3 \cdot 10^{-2}$  mbar) the product was obtained as an orange oil in moderate yield.

**Yield:** 1.00 g, 47%; **Elemental analysis:** calculated (%) C 35.91 H 4.02 N 4.65 , found (%) C 36.47 H 4.31 N 4.67; **<sup>1</sup>H-NMR:** (500 MHz, 298 K, C<sub>6</sub>D<sub>6</sub>): 7.54 (d, <sup>1</sup>J<sub>P,H</sub> = 375 Hz, 1H, P-H), 3.70 (dhept, <sup>3</sup>J<sub>P,H</sub> = 9.2 Hz, <sup>3</sup>J<sub>H,H</sub> = 6.7 Hz, 1H, CHMe<sub>2</sub>), 3.44 (pent, <sup>3</sup>J<sub>H,H</sub> = 8.4 Hz 1H, O-CH<sub>2</sub>), 3.38 – 3.29 (m, 1H, O-CH<sub>2</sub>), 2.46 – 2.30 (m, 1H, N-CH<sub>2</sub>), 2.04 (m, 1H, N-CH<sub>2</sub>), 0.88 (d, <sup>3</sup>J<sub>H,H</sub> = 6.7 Hz, 3H, CH<sub>3</sub>), 0.71 (d, <sup>3</sup>J<sub>H,H</sub> = 6.7 Hz, 3H, CH<sub>3</sub>); **<sup>13</sup>C{<sup>1</sup>H}-NMR:** (126 MHz, 298 K, C<sub>6</sub>D<sub>6</sub>): 212.3 (d, <sup>2</sup>J<sub>P,C</sub> = 22 Hz, CO), 67.5 (d, <sup>2</sup>J<sub>P,C</sub> = 10 Hz, O-CH<sub>2</sub>), 44.5 (d, <sup>2</sup>J<sub>P,C</sub> = 9.1 Hz, N-CH<sub>2</sub>), 40.1 (d, <sup>2</sup>J<sub>P,C</sub> = 2.1 Hz, N-CHMe<sub>2</sub>), 20.9 (d, <sup>2</sup>J<sub>P,C</sub> = 7.7 Hz, CH<sub>3</sub>), 19.0 (d, <sup>2</sup>J<sub>P,C</sub> = 7.7 Hz, CH<sub>3</sub>); **<sup>31</sup>P{<sup>1</sup>H}-NMR:** (203 MHz, 298 K, C<sub>6</sub>D<sub>6</sub>): 169.9 (s<sub>sat</sub>, <sup>1</sup>J<sub>Fe,P</sub> = 32 Hz); **<sup>31</sup>P-NMR:** (203 MHz, 298 K, C<sub>6</sub>D<sub>6</sub>): 169.9 (dm, <sup>1</sup>J<sub>P,H</sub> = 375 Hz).

#### Synthesis of [tetracarbonyl(3-methyl-1,3,2-oxazaphospholidine-κP)iron(0)] **5b**<sup>Fe</sup>:

In a 100 mL Schlenk flask 1.57 g (8 mmol, 1 eq.) K[Fe(CO)<sub>4</sub>H] were dissolved in 20 mL THF at 0 °C. In a 25 mL Schlenk tube 1.10 g (8 mmol, 1 eq.) **2b** were dissolved in 10 mL THF at 0 °C and then added to the K[Fe(CO)<sub>4</sub>H] suspension with a transfer canula. After the addition the canula was rinsed with 5 mL THF. Then the ice bath was removed and the yellow-brown mixture was stirred for 18 hours at room temperature after which the solvent was removed. The crude product was extracted from the residue with 40 mL (20+10+10 mL) *n*-pentane and the filtrate was dried to become a red oil. After further purification via inert column chromatography (h = 11 cm, ø= 4.5 cm, SiO<sub>2</sub> PE:Et<sub>2</sub>O (2.5% NEt<sub>3</sub>), -20 °C) from which the first (PE, 2.5% NEt<sub>3</sub>) and second (PE:Et<sub>2</sub>O, 2:1, 2.5% NEt<sub>3</sub>) fraction contained product. After removal of solvent and drying under reduces pressure (3·10<sup>-2</sup> mbar) the product was obtained as an orange oil in bad yield.

**Yield:** 660 mg, 32%; **Elemental analysis:** calculated (%) C 30.80 H 2.95 N 5.13 , found (%) C 31.59 H 3.39 N 5.14; **IR** (ATR diamond)  $\tilde{\nu}$  in cm<sup>-1</sup>: 2906 (m,  $\nu$ (C-H)), 2250 (w,  $\nu$ (P-H)), 2057 (s,  $\nu$ (C=O)), 1972 (vs,  $\nu$ (C=O)); **<sup>1</sup>H-NMR:** (400 MHz, 298 K, C<sub>6</sub>D<sub>6</sub>): 7.34 (d, <sup>1</sup>J<sub>P,H</sub> = 382 Hz, 1H), 3.52 – 3.39 (m(br), 1H, O-CH<sub>2</sub>), 3.29 – 3.21 (m(br), 1H, O-CH<sub>2</sub>), 2.23 (d, <sup>3</sup>J<sub>P,H</sub> = 13.7 Hz, 3H, N-CH<sub>3</sub>), 2.23 (m(br), 1H, N-CH<sub>2</sub>), 2.03 – 1.94 (m(br), 1H, N-CH<sub>2</sub>); **<sup>13</sup>C{<sup>1</sup>H}-NMR:** (126 MHz, 298 K, C<sub>6</sub>D<sub>6</sub>): 212.5 (d, <sup>2</sup>J<sub>P,C</sub> = 22 Hz, CO), 68.0 (s, O-CH<sub>2</sub>), 50.8 (s, N-CH<sub>2</sub>), 32.0 (s, N-CH<sub>3</sub>); **<sup>31</sup>P{<sup>1</sup>H}-NMR:** (203 MHz, 298 K, C<sub>6</sub>D<sub>6</sub>): 179.4 (s); **<sup>31</sup>P-NMR:** (203 MHz, 298 K, C<sub>6</sub>D<sub>6</sub>): 179.4 (d, <sup>1</sup>J<sub>P,H</sub> = 382 Hz).

#### Synthesis of [tetracarbonyl(4,4,5,5-tetramethyl-1,3,2-dioxaphospholane-κP)iron(0)] **6b**<sup>Fe</sup>:

In a 100 mL Schlenk flask 1.05 g (5 mmol, 1 eq.) K[Fe(CO)<sub>4</sub>H] were dissolved in 20 mL THF at 0 °C. In a 25 mL Schlenk tube 950 mg (5 mmol, 1 eq.) **3b** were dissolved in 5 mL THF at 0 °C and then added to the K[Fe(CO)<sub>4</sub>H] suspension with a transfer canula. After the addition the canula was rinsed with 5 mL THF. Then the ice bath was removed and the yellow-brown mixture was stirred for 1 hour at room temperature after which the solvent was removed. The crude product was extracted from the residue with 30 mL (10+10+10 mL) *n*-pentane and the filtrate was dried to become a red oil. After further purification via inert column chromatography (h = 11 cm, ø= 4.5 cm, SiO<sub>2</sub> PE:Et<sub>2</sub>O (2.5% NEt<sub>3</sub>), -20 °C) from which the first fraction (PE, 2.5% NEt<sub>3</sub>) contained product. After removal of solvent and drying under reduces pressure (3·10<sup>-2</sup> mbar) the product was obtained as an orange oil in low yield.

**Yield:** 445 mg, 28%; **Melting point:** 37 °C; **Elemental analysis:** calculated (%) C 38.01 H 4.15 , found (%) C 39.30 H 4.55; **MS:** (EI, 70 eV, selected data): m/z = 316.0 [M]<sup>++</sup>, 288.0 [M-CO]<sup>++</sup>, 260.0 [M-2CO]<sup>++</sup>, 232.0 [M-3CO]<sup>++</sup>, 204 [M-4CO]<sup>++</sup>; **IR** (ATR diamond)  $\tilde{\nu}$  in cm<sup>-1</sup>: 2985 (m,  $\nu$ (C-H)), 2321 (w,  $\nu$ (P-H)), 2056 (s,  $\nu$ (C=O)), 1988 (m,  $\nu$ (C=O)), 1925 (vs,  $\nu$ (C=O)); **<sup>1</sup>H-NMR:** (500 MHz, 298 K, C<sub>6</sub>D<sub>6</sub>): 8.06 (d, <sup>1</sup>J<sub>P,H</sub> = 409 Hz, 1H, P-H), 0.95 (s, 6H, C(CH<sub>3</sub>)<sub>2</sub>), 0.70 (s, C(CH<sub>3</sub>)<sub>2</sub>); **<sup>13</sup>C{<sup>1</sup>H}-NMR:** (126 MHz, 298 K, C<sub>6</sub>D<sub>6</sub>): 212.43 (d, <sup>2</sup>J<sub>P,C</sub> = 23 Hz, CO), 88.1 (d, <sup>2</sup>J<sub>P,C</sub> = 6 Hz, C<sub>2</sub>Me<sub>4</sub>), 24.4 (d, <sup>3</sup>J<sub>P,C</sub> = 5 Hz, C<sub>2</sub>(CH<sub>3</sub>)<sub>4</sub>), 21.7 (d, <sup>3</sup>J<sub>P,C</sub> = 4 Hz, C<sub>2</sub>(CH<sub>3</sub>)<sub>4</sub>); **<sup>31</sup>P{<sup>1</sup>H}-NMR:** (203 MHz, 298 K, C<sub>6</sub>D<sub>6</sub>): 196.4 (s<sub>sat</sub>, <sup>1</sup>J<sub>Fe,P</sub> = 36 Hz); **<sup>31</sup>P-NMR:** (203 MHz, 298 K, C<sub>6</sub>D<sub>6</sub>): 196.4 (d, <sup>1</sup>J<sub>P,H</sub> = 409 Hz).



#### Synthesis of [tetracarbonyl(1H benzo[4,5-c]-2,3-dihydro-1,3,2-dioxaphosphole-κP)iron(0)] **6c<sup>Fe</sup>**:

In a 100 mL Schlenk flask 425 mg (2 mmol, 1 eq.) K[Fe(CO)<sub>4</sub>H] were dissolved in 10 mL THF at 0 °C. In a 25 mL Schlenk tube 400 mg (2 mmol, 1.1 eq.) **3c** were dissolved in 3 mL THF at 0 °C and then added to the K[Fe(CO)<sub>4</sub>H] suspension with a transfer canula. After the addition the canula was rinsed twice with 3.5 mL THF. Then the ice bath was removed and the yellow-brown mixture was stirred for 2.5 hours at room temperature after which the solvent was removed. The crude product was extracted from the residue with 60 mL (15+10+10+10+10+5 mL) *n*-pentane and the red filtrate was dried to become a yellow beige solid. The product can be recrystallized from a saturated *n*-pentane solution, however an impurity (2 – 5%) with a δ(<sup>31</sup>P) chemical shift of 192 ppm was still observed. Further attempts to purify the crude product via inert column chromatography (h = 11 cm, φ = 4.5 cm, SiO<sub>2</sub> PE:Et<sub>2</sub>O (2.5% NEt<sub>3</sub>), –20 °C) lead to hydrolysis (**7** in only small yields. If under the same conditions NEt<sub>3</sub> is not used nothing is collected in several fractions for several PE:Et<sub>2</sub>O ratios.

**Yield:** 505 mg, 82% (crude product, after solvent removal; 2% impurity); **MS:** (EI, 70 eV, selected data): m/z (%) 307.9 [M]<sup>+</sup>, 279.9 [M-CO]<sup>+</sup>, 251.9 [M-2CO]<sup>+</sup>, 223.9 [M-3CO]<sup>+</sup>, 196.0 [M-4CO]<sup>+</sup>; **IR** (ATR diamond)  $\tilde{\nu}$  in cm<sup>-1</sup>: 2985 (m, ν(C-H)), 2321 (w, ν(P-H)), 2056 (s, ν(C=O)), 1988 (m, ν(C=O)), 1925 (vs, ν(C=O)); **<sup>1</sup>H-NMR:** (500 MHz, 298 K, C<sub>6</sub>D<sub>6</sub>): 8.67 (d, <sup>1</sup>J<sub>P,H</sub> = 432 Hz, 1H, P-H), 7.26 – 7.21 (m, 2H, C<sub>6</sub>H<sub>4</sub>), 7.12 – 7.07 (m, 2H, C<sub>6</sub>H<sub>4</sub>); **<sup>13</sup>C{<sup>1</sup>H}-NMR:** (126 MHz, 298 K, THF-d<sub>8</sub>): 211.6 (d, <sup>2</sup>J<sub>P,C</sub> = 22 Hz, CO), 148.1 (d, <sup>2</sup>J<sub>P,C</sub> = 6 Hz, C<sub>6</sub>H<sub>4</sub>), 125.3 (s, C<sub>6</sub>H<sub>4</sub>), 114.1 (d, <sup>2</sup>J<sub>P,C</sub> = 7 Hz, C<sub>6</sub>H<sub>4</sub>); **<sup>31</sup>P{<sup>1</sup>H}-NMR:** (203 MHz, 298 K, THF-d<sub>8</sub>): 228.7 (s<sub>sat</sub>, <sup>1</sup>J<sub>Fe,P</sub> = 40 Hz), **<sup>31</sup>P-NMR:** (203 MHz, 298 K, THF-d<sub>8</sub>): 228.7 (d, <sup>1</sup>J<sub>P,H</sub> = 432 Hz).

#### Synthesis of triethylammonium[tetracarbonyl([2-hydroxy-phenoxy]-phosphinito-κP)ferrate(0)] **7**:

**6c<sup>Fe</sup>** was synthesized from 900 mg (5 mmol, 1 eq.) of **3c** and 1.06 g (5 mmol, 1 eq.) K[Fe(CO)<sub>4</sub>H]. The crude product was charged on an inert column for purification (h = 11 cm, φ = 4.5 cm, SiO<sub>2</sub> PE:Et<sub>2</sub>O (2.5% NEt<sub>3</sub>), –20 °C). An initial yellow band on the column stopped, after one third the height and could only be eluted with THF (2.5% NEt<sub>3</sub>). After removing the solvent from this fraction, a colourless solid **7** was obtained in very low yield.

**Yield:** 80 mg, 4%; **Elemental analysis:** calculated (%) C 44.99 H 5.19 N 3.28, found (%) C 45.43 H 5.29 N 3.36; **<sup>1</sup>H-NMR:** (500 MHz, 298 K, C<sub>6</sub>D<sub>6</sub>): 10.66 (s(br), 1H, O-H), 9.34 (s(br), 1H, N-H), 8.87 (d, <sup>1</sup>J<sub>P,H</sub> = 414 Hz, 1H, P-H), 7.34 (dt, <sup>3</sup>J<sub>H,H</sub> = 8 Hz, <sup>3</sup>J<sub>H,H</sub> = 1.6 Hz, 1H, C<sub>6</sub>H<sub>4</sub>), 7.17 (dd, <sup>2</sup>J<sub>H,H</sub> = 8 Hz, <sup>3</sup>J<sub>H,H</sub> = 1.6 Hz, 1H, C<sub>6</sub>H<sub>4</sub>), 6.91 (m, <sup>X</sup>J<sub>P,H</sub> = 9.4 Hz, <sup>3</sup>J<sub>H,H</sub> = 1.6 Hz, 1H, C<sub>6</sub>H<sub>4</sub>), 6.73 – 6.69 (m, 1H, C<sub>6</sub>H<sub>4</sub>), 1.96 (q, <sup>3</sup>J<sub>H,H</sub> = 7.3 Hz, 6H, N-CH<sub>2</sub>-Me), 0.51 (t, <sup>3</sup>J<sub>H,H</sub> = 7.3 Hz, 9H, N-CH<sub>2</sub>-CH<sub>3</sub>); **<sup>13</sup>C{<sup>1</sup>H}-NMR:** (126 MHz, 298 K, THF-d<sub>8</sub>): 215.7 (d, <sup>2</sup>J<sub>P,C</sub> = 23 Hz, CO), 149.3 (d, <sup>3</sup>J<sub>P,C</sub> = 4 Hz, HO-C<sub>6</sub>H<sub>4</sub>), 145.3 (d, <sup>3</sup>J<sub>P,C</sub> = 16 Hz, P-O-C<sub>6</sub>H<sub>4</sub>), 125.85 (d, <sup>X</sup>J<sub>P,C</sub> = 1.7 Hz, C<sub>6</sub>H<sub>4</sub>), 123.30 (d, <sup>X</sup>J<sub>P,C</sub> = 4.3 Hz, C<sub>6</sub>H<sub>4</sub>), 120.74 (d, <sup>X</sup>J<sub>P,C</sub> = 1.6 Hz, C<sub>6</sub>H<sub>4</sub>), 118.24 (d, <sup>X</sup>J<sub>P,C</sub> = 1.6 Hz, C<sub>6</sub>H<sub>4</sub>), 45.50 (s, N-CH<sub>2</sub>-Me), 8.06 (s, N-CH<sub>2</sub>-CH<sub>3</sub>); **<sup>31</sup>P{<sup>1</sup>H}-NMR:** (203 MHz, 298 K, THF-d<sub>8</sub>): 159.3 (s<sub>sat</sub>, <sup>1</sup>J<sub>Fe,P</sub> = 28 Hz); **<sup>31</sup>P-NMR:** (203 MHz, 298 K, THF-d<sub>8</sub>): 159.3 (d, <sup>1</sup>J<sub>P,H</sub> = 414 Hz).

#### References

- (1) Jones, A. S.; McGuigan, C.; Walker, R. T. Synthesis of Some Nucleoside Cyclic Phosphoramidates and Related Compounds via Phosphoramidites. *J. Chem. Soc. Perkin Trans. 1* **1985**, No. 6, 199–202. <https://doi.org/10.1039/p19850000199>.
- (2) Breen, D.; Kennedy, A. R.; Suckling, C. J. A Divergent Synthesis of Minor Groove Binders with Tail Group Variation. *Org. Biomol. Chem.* **2009**, 7 (1), 178–186. <https://doi.org/10.1039/b814452d>.
- (3) Denmark, S. E.; Stadler, H.; Dorow, R. L.; Kim, J. H. Carbanion-Accelerated Claisen Rearrangements. 8. Phosphonamide Anion-Stabilizing Groups. *J. Org. Chem.* **1991**, 56 (17), 5063–5079. <https://doi.org/10.1021/jo00017a016>.
- (4) A. Gual, C. G.; Fuente, V. de la; Castillón, S. Phosphorus (III) Ligands in Homogeneous Catalysis:

Design and Synthesis. In *Focus on Catalysts*; 2012; pp 81–131. [https://doi.org/10.1016/S1351-4180\(13\)70046-1](https://doi.org/10.1016/S1351-4180(13)70046-1).

- (5) Wang, Y.-F.; Zhang, M.-T. Proton-Coupled Electron-Transfer Reduction of Dioxygen: The Importance of Precursor Complex Formation between Electron Donor and Proton Donor. *J. Am. Chem. Soc.* **2022**, *144* (27), 12459–12468. <https://doi.org/10.1021/jacs.2c04467>.
- (6) Brunet, J. J.; Commenges, G.; Kindela, F. B.; Neibecker, D. Ligand Substitution Processes on Carbonylmetal Derivatives. 1. Reaction of Tetracarbonylhydridoferrates with Phosphines. *Organometallics* **1992**, *11* (3), 1343–1350. <https://doi.org/10.1021/om00039a045>.

## NMR Spectra of

### 1b<sup>Fe</sup>

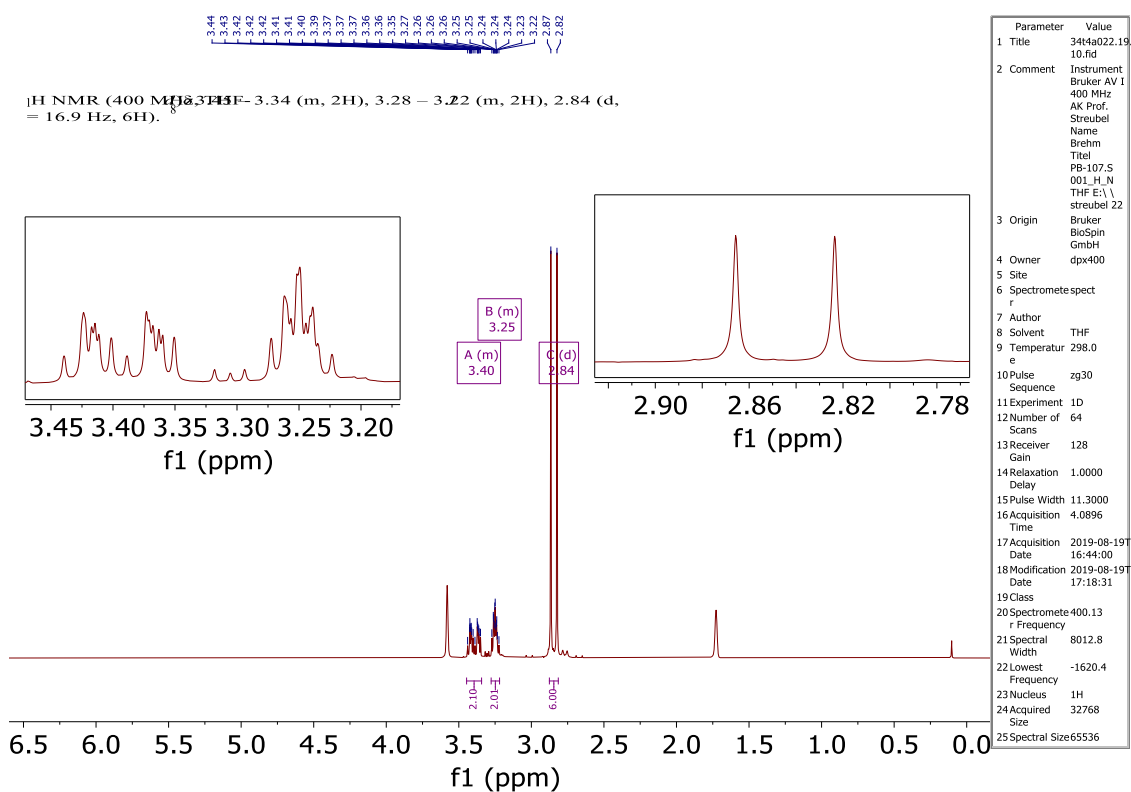

Figure 1 <sup>1</sup>H-NMR spectrum of 1b<sup>Fe</sup> in THF-d<sub>8</sub>.



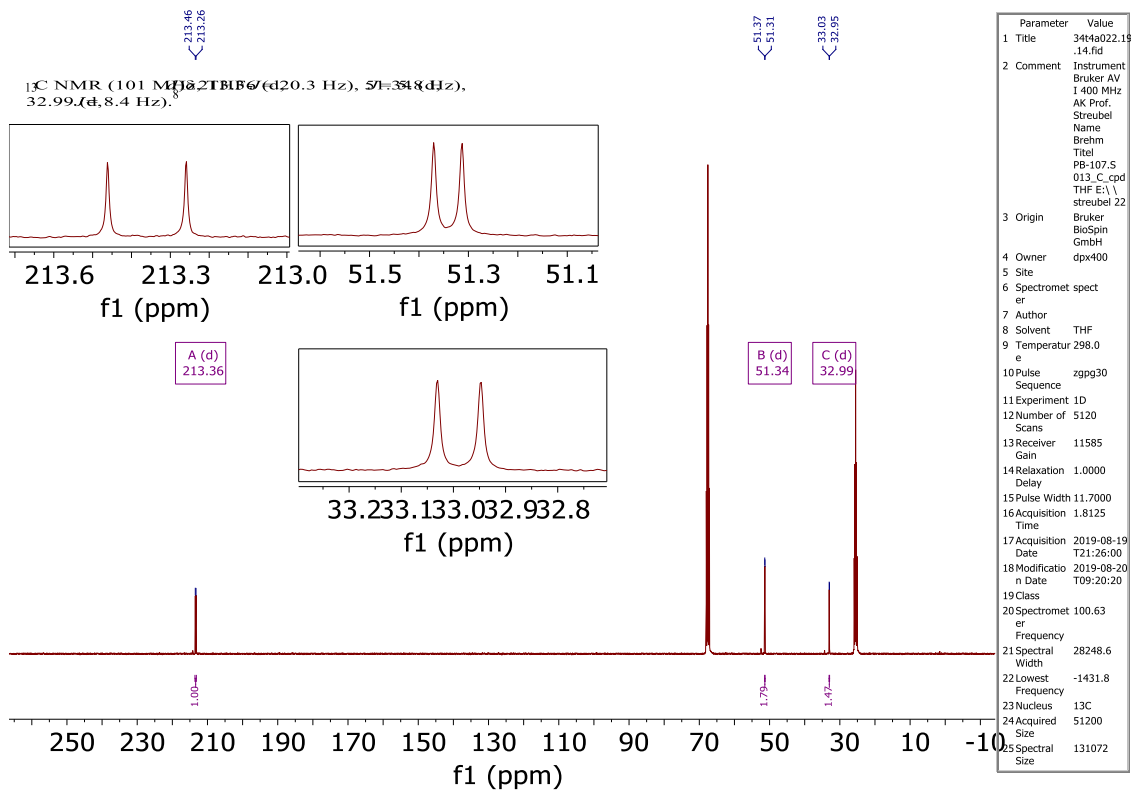

Figure 2 <sup>13</sup>C{<sup>1</sup>H}-NMR spectrum of **1b<sup>Fe</sup>** in THF-d<sub>8</sub>.

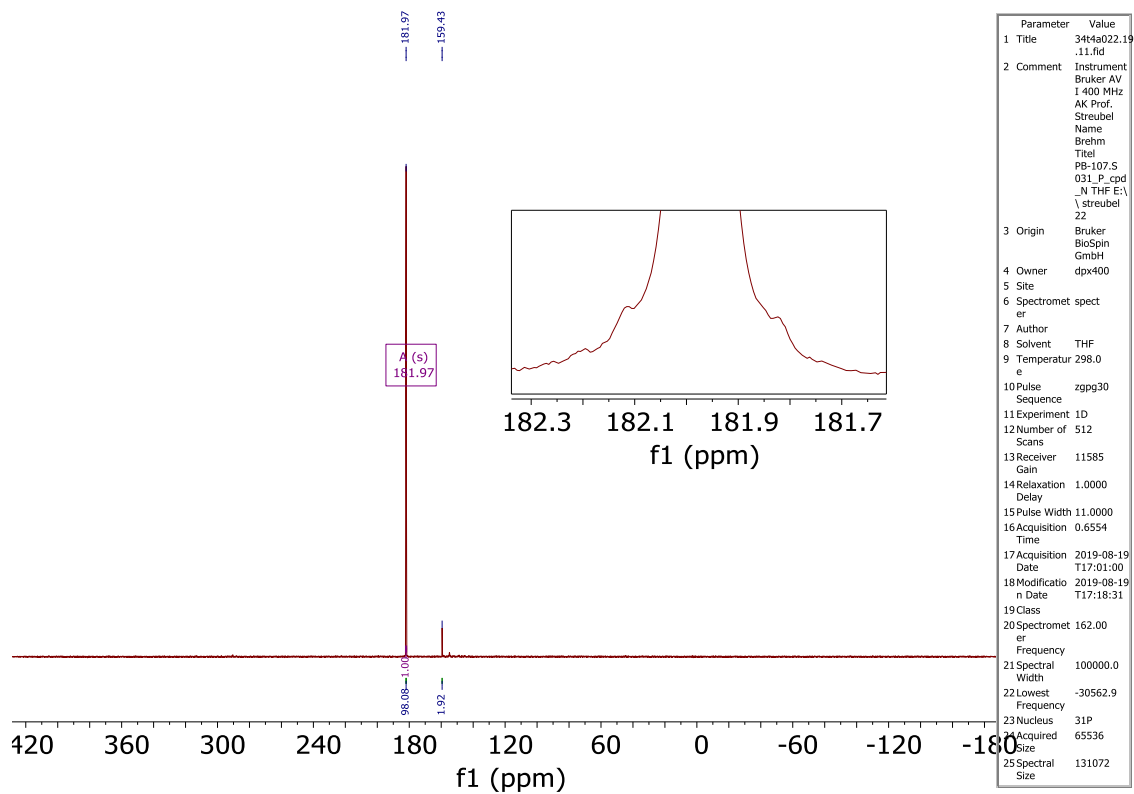

Figure 3 <sup>31</sup>P{<sup>1</sup>H}-NMR spectrum of **1b<sup>Fe</sup>** in THF-d<sub>8</sub>.

3b<sup>Fe</sup>

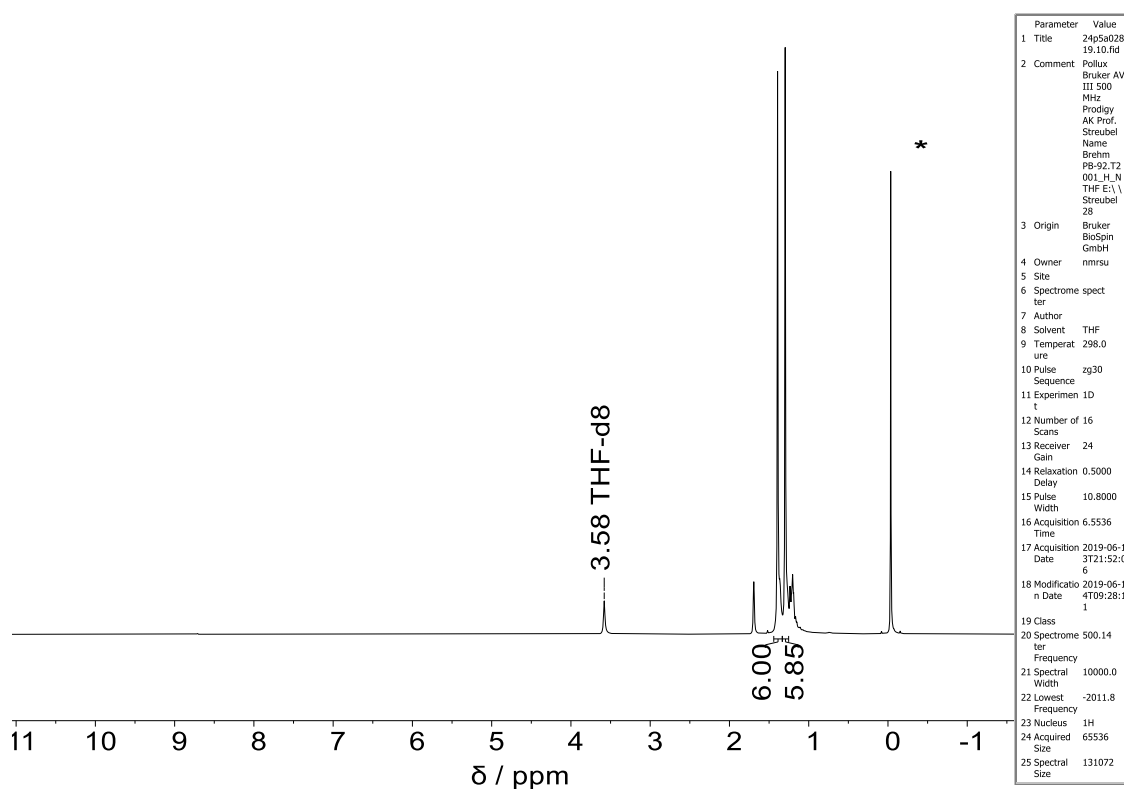

Figure 4 <sup>1</sup>H-NMR spectrum of 3b<sup>Fe</sup> in THF-d<sub>8</sub>.

<sup>13</sup>C NMR (126 MHz, THF-d<sub>8</sub>) (d<sub>11.7</sub> Hz), 91.72 (d), 24.46 (d, = 6.0 Hz), 23.73 (d).

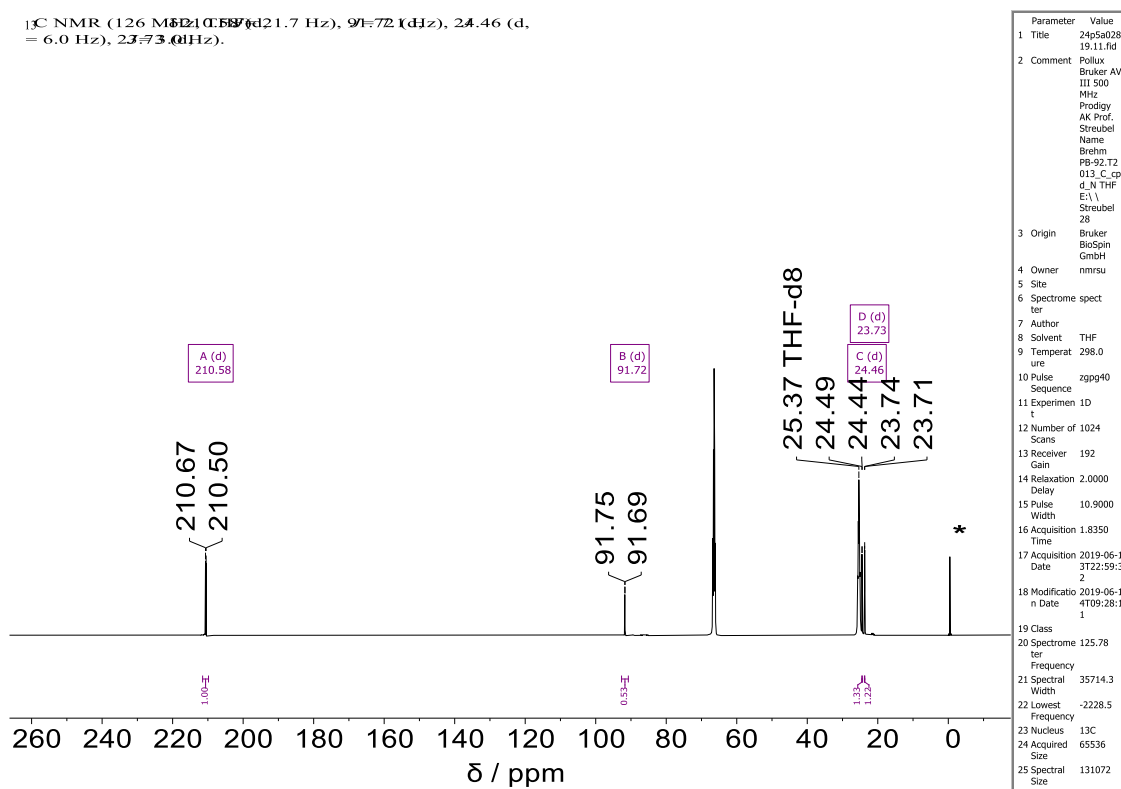

Figure 5 <sup>13</sup>C{<sup>1</sup>H}-NMR spectrum of 3b<sup>Fe</sup> in THF-d<sub>8</sub>.

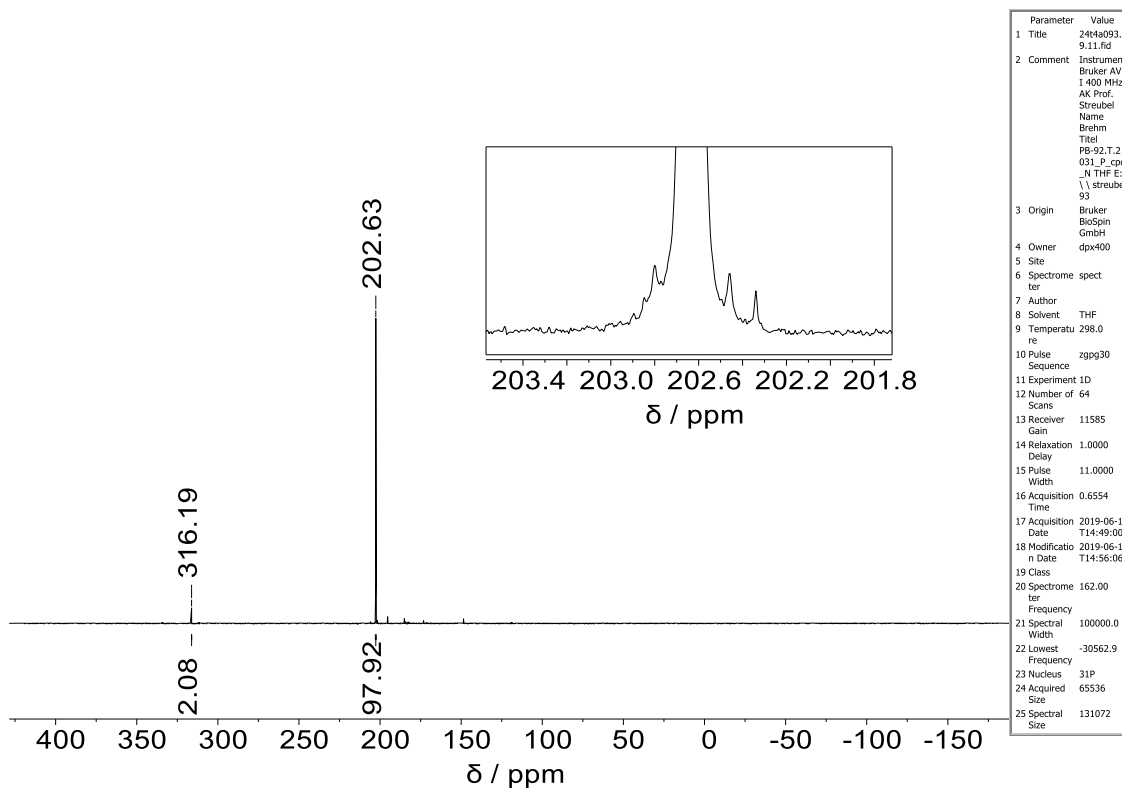

Figure 6  $^{31}\text{P}\{^1\text{H}\}$ -NMR spectrum of  $3b^{\text{Fe}}$  in THF-d<sub>8</sub>.

$3c^{\text{Fe}}$

$^1\text{H}$  NMR (500 MHz, THF-d<sub>8</sub>)  $\delta$ : 7.31 (d, 6.0, 3.4 Hz, 1H), 7.20 (d, 6.0, 3.4 Hz, 1H).

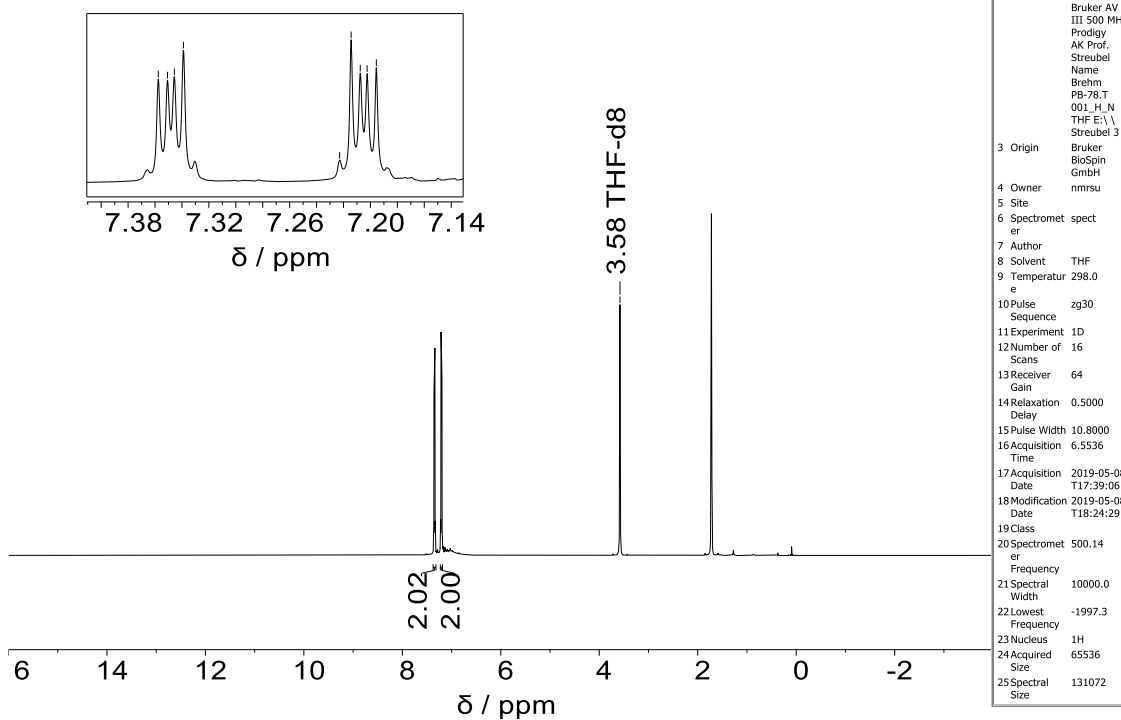

Figure 7  $^1\text{H}$ -NMR spectrum of  $3c^{\text{Fe}}$  in THF-d<sub>8</sub>.

$^{13}\text{C}$  NMR (126 MHz, THF-d<sub>8</sub>)  $\delta$ : 211.39, 211.27, 146.15, 146.09, 126.03, 114.53, 114.48, 67.57 (THF-d<sub>8</sub>), 126.03, 114.50 (cd, 6.7 Hz).

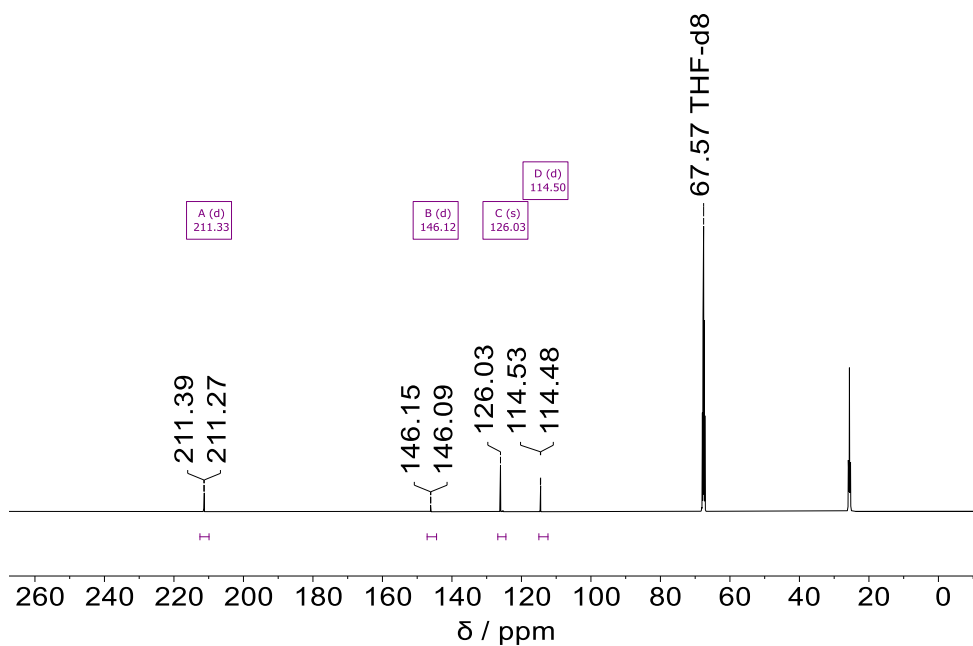

| Parameter               | Value                                                                                                    |
|-------------------------|----------------------------------------------------------------------------------------------------------|
| 1 Title                 | 19p5b003.19.11.fid                                                                                       |
| 2 Comment               | Pollux Bruker AV III 500 MHz Prodigy AK Prof. Streubel Name Brehm PB-78.T 013_C_cpd_N THF E:\ Streubel 3 |
| 3 Origin                | Bruker BioSpin GmbH                                                                                      |
| 4 Owner                 | nmsu                                                                                                     |
| 5 Site                  |                                                                                                          |
| 6 Spectrometer specter  |                                                                                                          |
| 7 Author                |                                                                                                          |
| 8 Solvent               | THF                                                                                                      |
| 9 Temperature           | 298.0 e                                                                                                  |
| 10 Pulse Sequence       | zgpg40                                                                                                   |
| 11 Experiment           | 1D                                                                                                       |
| 12 Number of Scans      | 1500                                                                                                     |
| 13 Receiver Gain        | 192                                                                                                      |
| 14 Relaxation Delay     | 2.0000                                                                                                   |
| 15 Pulse Width          | 10.9000                                                                                                  |
| 16 Acquisition Time     | 1.8350                                                                                                   |
| 17 Acquisition Date     | 2019-05-08 T19:17:27                                                                                     |
| 18 Modification Date    | 2019-05-09 T13:46:30                                                                                     |
| 19 Class                |                                                                                                          |
| 20 Spectrometer specter | 125.78                                                                                                   |
| 21 Frequency            | 35714.3                                                                                                  |
| 22 Lowest Frequency     | -1996.5                                                                                                  |
| 23 Nucleus              | $^{13}\text{C}$                                                                                          |
| 24 Acquired Size        | 65536                                                                                                    |
| 25 Spectral Size        | 131072                                                                                                   |

Figure 8  $^{13}\text{C}\{^1\text{H}\}$ -NMR spectrum of  $3\text{c}^{\text{Fe}}$  in THF-d<sub>8</sub>.

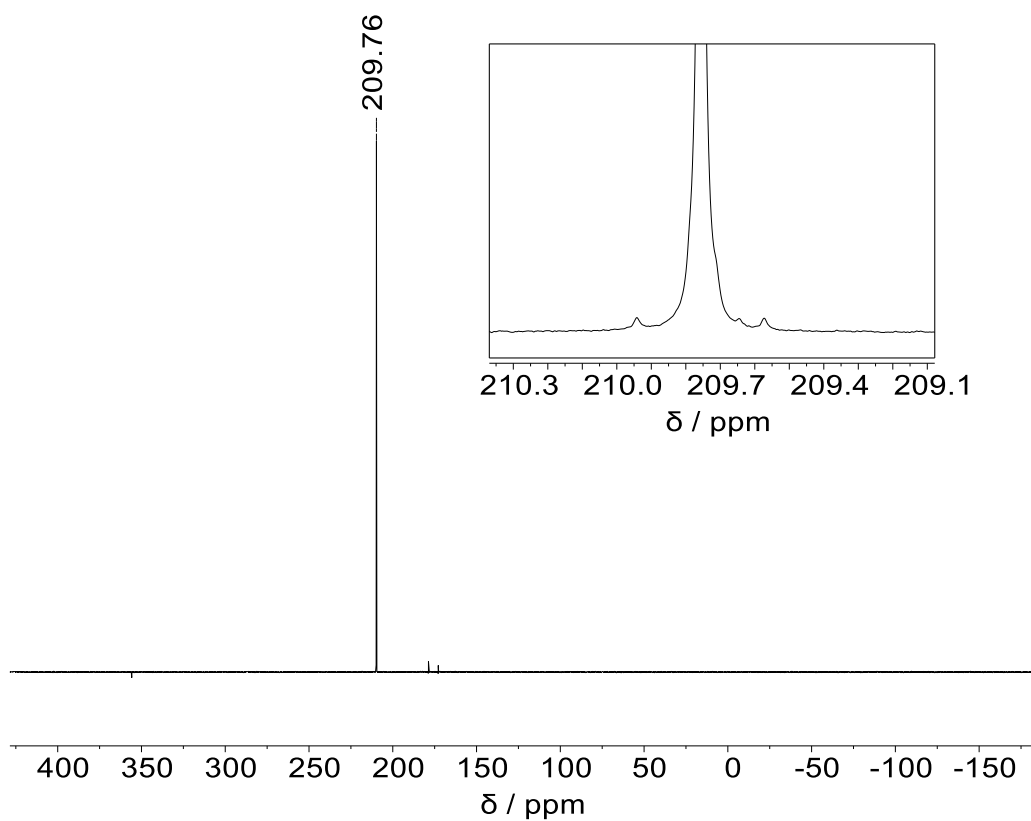

| Parameter               | Value                                                                                                    |
|-------------------------|----------------------------------------------------------------------------------------------------------|
| 1 Title                 | 19p5b003.19.12.fid                                                                                       |
| 2 Comment               | Pollux Bruker AV III 500 MHz Prodigy AK Prof. Streubel Name Brehm PB-78.T 031_P_cpd_N THF E:\ Streubel 3 |
| 3 Origin                | Bruker BioSpin GmbH                                                                                      |
| 4 Owner                 | nmsu                                                                                                     |
| 5 Site                  |                                                                                                          |
| 6 Spectrometer specter  |                                                                                                          |
| 7 Author                |                                                                                                          |
| 8 Solvent               | THF                                                                                                      |
| 9 Temperature           | 298.0                                                                                                    |
| 10 Pulse Sequence       | zgpg30                                                                                                   |
| 11 Experiment           | 1D                                                                                                       |
| 12 Number of Scans      | 32                                                                                                       |
| 13 Receiver Gain        | 192                                                                                                      |
| 14 Relaxation Delay     | 2.0000                                                                                                   |
| 15 Pulse Width          | 11.9000                                                                                                  |
| 16 Acquisition Time     | 1.0486                                                                                                   |
| 17 Acquisition Date     | 2019-05-08 T19:20:24                                                                                     |
| 18 Modification Date    | 2019-05-09 T13:46:30                                                                                     |
| 19 Class                |                                                                                                          |
| 20 Spectrometer specter | 202.48                                                                                                   |
| 21 Frequency            | 125000.0                                                                                                 |
| 22 Lowest Frequency     | -38204.8                                                                                                 |
| 23 Nucleus              | $^{31}\text{P}$                                                                                          |
| 24 Acquired Size        | 131072                                                                                                   |
| 25 Spectral Size        | 262144                                                                                                   |

Figure 9  $^{31}\text{P}\{^1\text{H}\}$ -NMR spectrum of  $3\text{c}^{\text{Fe}}$  in THF-d<sub>8</sub>.

4a<sup>Fe</sup>

<sup>1</sup>H NMR (500 MHz, C<sub>6</sub>D<sub>6</sub>) δ: 7.92 (d, 3H, 3.74 Hz, 1H) / 7.16 (d, 3H, 3.74 Hz, 1H), 3.38 (m, 1H), 2.46 (m, 1H) / 2.03 (d, 3H, 2.03 Hz, 3H), 0.88 (t, 3H) / 0.70 (t, 3H).

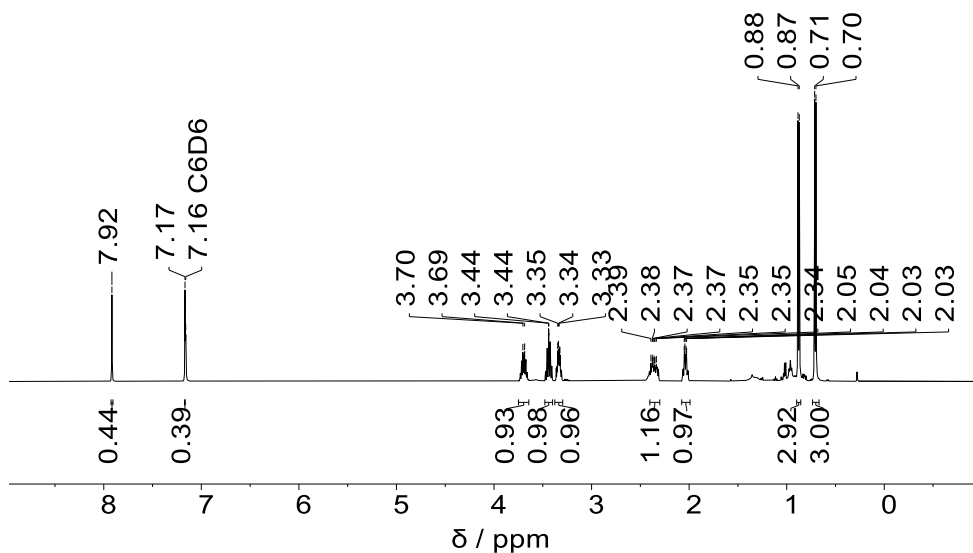

| Parameter                 | Value                                                                                                                               |
|---------------------------|-------------------------------------------------------------------------------------------------------------------------------------|
| 1 Title                   | PCB230303p<br>5a034.10.fid                                                                                                          |
| 2 Comment                 | Pollux<br>Bruker AV<br>III 500 MHz<br>Prodigy<br>AK Prof.<br>Streubel<br>Name Brehm<br>PB-552<br>001_H_N<br>C6D6 E:\<br>Streubel 34 |
| 3 Origin                  | Bruker<br>BioSpin<br>GmbH                                                                                                           |
| 4 Owner                   | nmsu                                                                                                                                |
| 5 Site                    |                                                                                                                                     |
| 6 Spectrometer spect      |                                                                                                                                     |
| 7 Author                  |                                                                                                                                     |
| 8 Solvent                 | C6D6                                                                                                                                |
| 9 Temperature             | 298.0                                                                                                                               |
| 10 Pulse                  | zg30                                                                                                                                |
| Sequence                  |                                                                                                                                     |
| 11 Experiment             | 1D                                                                                                                                  |
| 12 Number of Scans        | 16                                                                                                                                  |
| 13 Receiver Gain          | 30                                                                                                                                  |
| 14 Relaxation Delay       | 0.5000                                                                                                                              |
| 15 Pulse Width            | 11.0000                                                                                                                             |
| 16 Acquisition Time       | 5.4526                                                                                                                              |
| 17 Acquisition Date       | 2023-03-04T<br>15:04:45                                                                                                             |
| 18 Modification Date      | 2023-03-06T<br>10:11:04                                                                                                             |
| 19 Class                  |                                                                                                                                     |
| 20 Spectrometer Frequency | 500.04                                                                                                                              |
| 21 Spectral Width         | 12019.2                                                                                                                             |
| 22 Lowest Frequency       | -2009.2                                                                                                                             |
| 23 Nucleus                | <sup>1</sup> H                                                                                                                      |
| 24 Acquired Size          | 65536                                                                                                                               |
| 25 Spectral Size          | 131072                                                                                                                              |

Figure 10 <sup>1</sup>H-NMR spectrum of 3c<sup>Fe</sup> in C<sub>6</sub>D<sub>6</sub>.

<sup>13</sup>C NMR (126 MHz, C<sub>6</sub>D<sub>6</sub>) δ: 212.74 (d, 2.1 Hz), 212.57 (d, 2.1 Hz), 67.90 (d, 1.1 Hz), 67.82 (d, 1.1 Hz), 40.49 (d, 2.1 Hz), 40.34 (d, 2.1 Hz), 21.28 (t, 5.0 Hz), 19.36 (t, 5.0 Hz), 19.34 (t, 5.0 Hz).

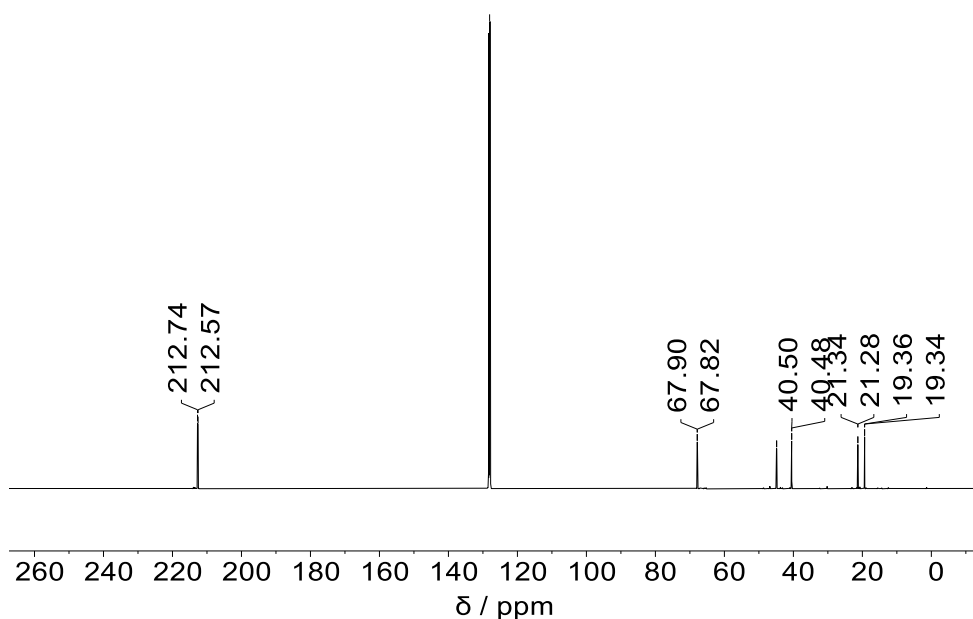

| Parameter                | Value                                                                                                                                      |
|--------------------------|--------------------------------------------------------------------------------------------------------------------------------------------|
| 1 Title                  | PCB230303p<br>5a034.11.fid                                                                                                                 |
| 2 Comment                | Pollux<br>Bruker AV<br>III 500 MHz<br>Prodigy<br>AK Prof.<br>Streubel<br>Name Brehm<br>PB-552<br>013_C.cpd<br>N C6D6 E:\<br>Streubel<br>34 |
| 3 Origin                 | Bruker<br>BioSpin<br>GmbH                                                                                                                  |
| 4 Owner                  | nmsu                                                                                                                                       |
| 5 Site                   |                                                                                                                                            |
| 6 Spectromete spect      | r                                                                                                                                          |
| 7 Author                 |                                                                                                                                            |
| 8 Solvent                | C6D6                                                                                                                                       |
| 9 Temperature            | 298.0                                                                                                                                      |
| 10 Pulse                 | zpgg40                                                                                                                                     |
| Sequence                 |                                                                                                                                            |
| 11 Experiment            | 1D                                                                                                                                         |
| 12 Number of Scans       | 512                                                                                                                                        |
| 13 Receiver Gain         | 192                                                                                                                                        |
| 14 Relaxation Delay      | 2.0000                                                                                                                                     |
| 15 Pulse Width           | 10.7800                                                                                                                                    |
| 16 Acquisition Time      | 1.8350                                                                                                                                     |
| 17 Acquisition Date      | 2023-03-04T<br>15:38:58                                                                                                                    |
| 18 Modification Date     | 2023-03-06T<br>10:11:06                                                                                                                    |
| 19 Class                 |                                                                                                                                            |
| 20 Spectromete Frequency | 125.75                                                                                                                                     |
| 21 Spectral Width        | 35714.3                                                                                                                                    |
| 22 Lowest Frequency      | -2092.5                                                                                                                                    |
| 23 Nucleus               | <sup>13</sup> C                                                                                                                            |
| 24 Acquired Size         | 65536                                                                                                                                      |
| 25 Spectral Size         | 131072                                                                                                                                     |

Figure 11 <sup>13</sup>C[<sup>1</sup>H]-NMR spectrum of 4a<sup>Fe</sup> in C<sub>6</sub>D<sub>6</sub>.

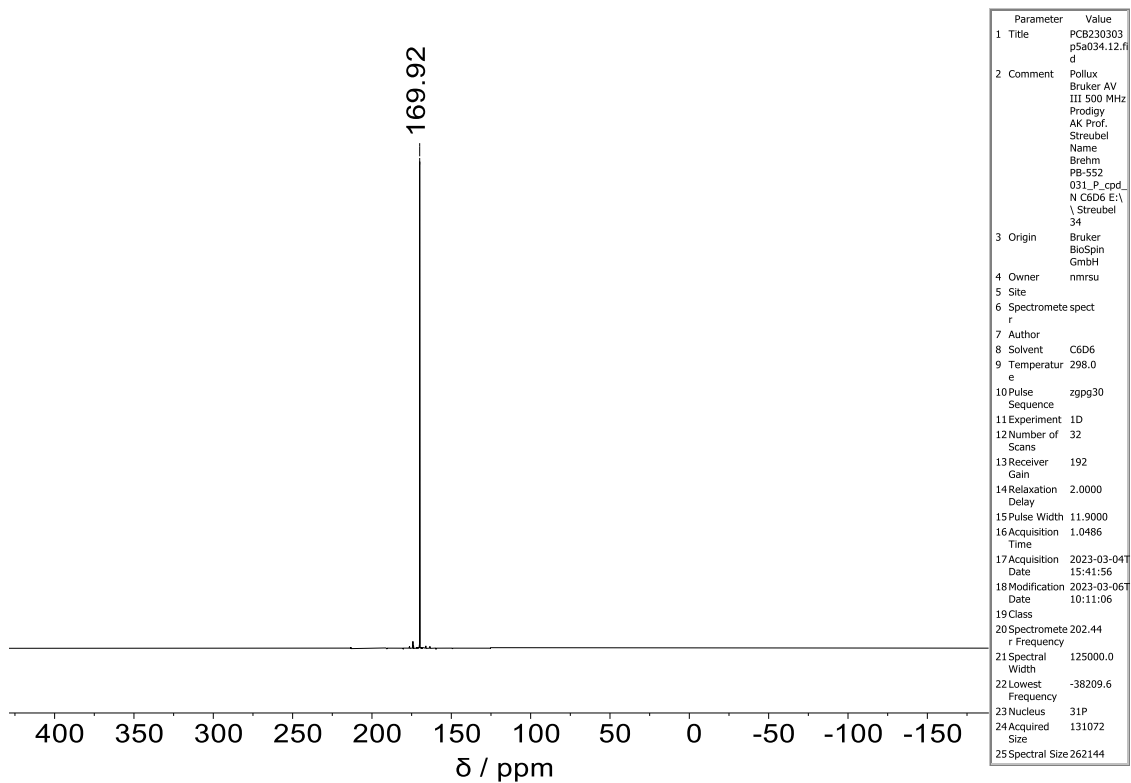

Figure 12  $^{31}\text{P}\{^1\text{H}\}$ -NMR spectrum of  $4a^{\text{Fe}}$  in  $\text{C}_6\text{D}_6$ .

$4b^{\text{Fe}}$

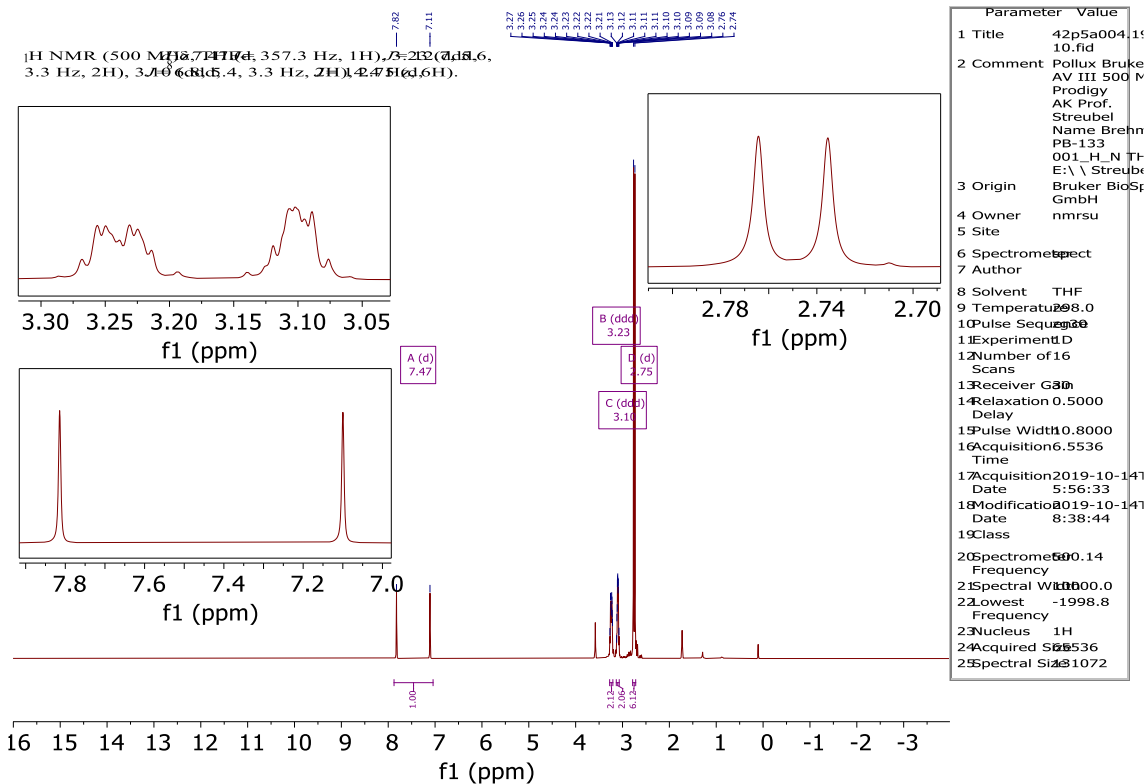

Figure 13  $^1\text{H}$ -NMR spectrum of  $4b^{\text{Fe}}$  in  $\text{THF-d}_8$ .



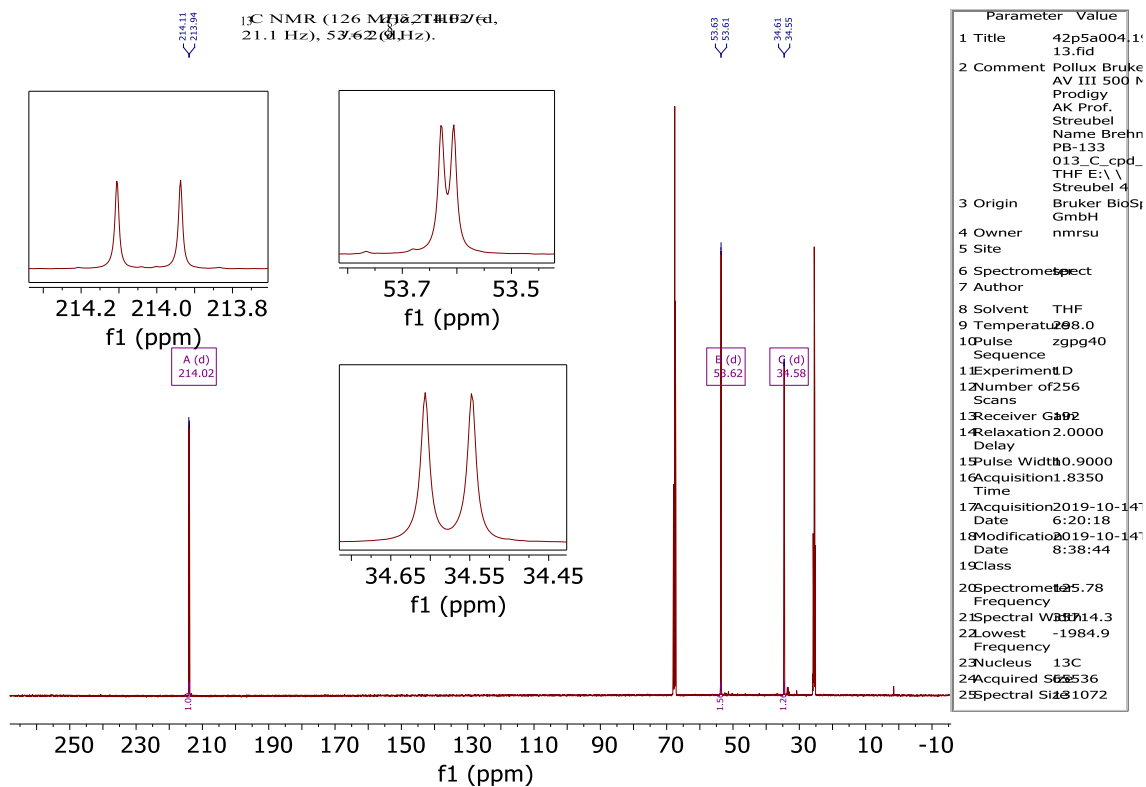

Figure 14 <sup>13</sup>C{<sup>1</sup>H}-NMR spectrum of **4b<sup>Fe</sup>** in THF-d<sub>8</sub>.

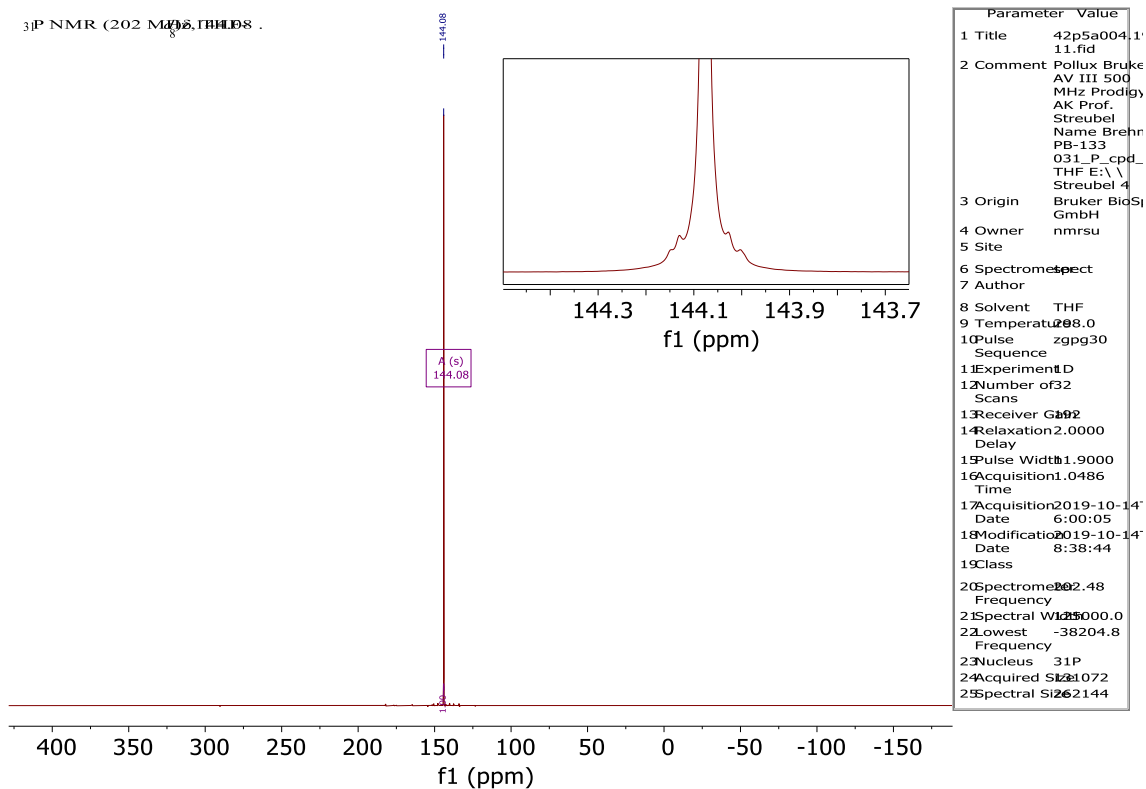

Figure 15 <sup>31</sup>P{<sup>1</sup>H}-NMR spectrum of **4b<sup>Fe</sup>** in THF-d<sub>8</sub>.

$4c^{Fe}$

$^1H$  NMR (300 MHz, THF-d<sub>8</sub>)  $\delta$ : 6.85 – 6.68 (m, 4H), 3.61 (d, 2H), 3.58 (s, 1H), 3.15 (s, 1H), 3.12 (s, 1H), 3.10 (s, 1H), 3.08 (s, 1H), 3.06 (s, 1H), 6.77 (d, 1H), 6.75 (d, 1H), 8.34 (s, 1H), 9.53 (s, 1H)

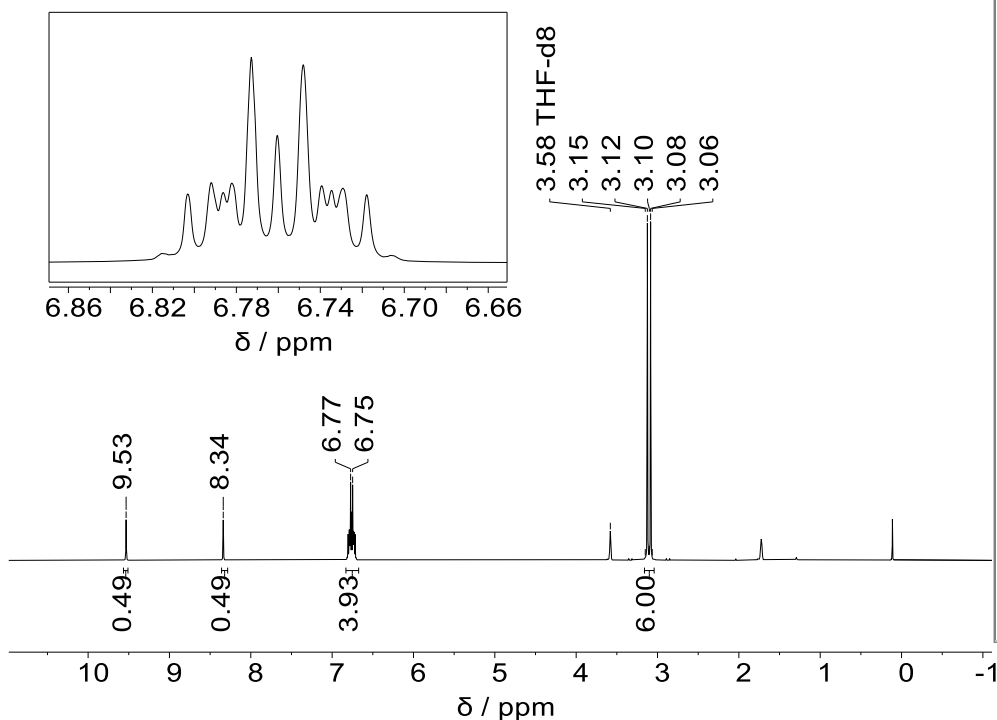

| Parameter       | Value       |
|-----------------|-------------|
| 1 Title         | 21m3a028.2  |
| 1.10.fid        |             |
| 2 Comment       | AK streubel |
| Name            | Brehm       |
| PB-272.E1       |             |
| 001_H_N         |             |
| THF E:\         |             |
| streubel 28     |             |
| 3 Origin        | Bruker      |
| BioSpin         |             |
| GmbH            |             |
| 4 Owner         | dmx300      |
| 5 Site          |             |
| 6 Spectromete   | spect       |
| er              |             |
| 7 Author        |             |
| 8 Solvent       | THF         |
| 9 Temperature   | 296.1       |
| e               |             |
| 10 Pulse        | zg30        |
| Sequence        |             |
| 11 Experiment   | 1D          |
| 12 Number of    | 16          |
| Scans           |             |
| 13 Receiver     | 228         |
| Gain            |             |
| 14 Relaxation   | 1.0000      |
| Delay           |             |
| 15 Pulse Width  | 13.6000     |
| 16 Acquisition  | 5.4527      |
| Time            |             |
| 17 Acquisition  | 2021-05-26  |
| Date            | T17:17:00   |
| 18 Modification | 2021-05-26  |
| Date            | T17:43:42   |
| 19 Class        |             |
| 20 Spectromete  | 300.13      |
| er              |             |
| Frequency       |             |
| 21 Spectral     | 6009.6      |
| Width           |             |
| 22 Lowest       | -1215.3     |
| Frequency       |             |
| 23 Nucleus      | $^1H$       |
| 24 Acquired     | 32768       |
| Size            |             |
| 25 Spectral     | 65536       |
| Size            |             |

Figure 16  $^1H$ -NMR spectrum of  $4c^{Fe}$  in THF-d<sub>8</sub>.

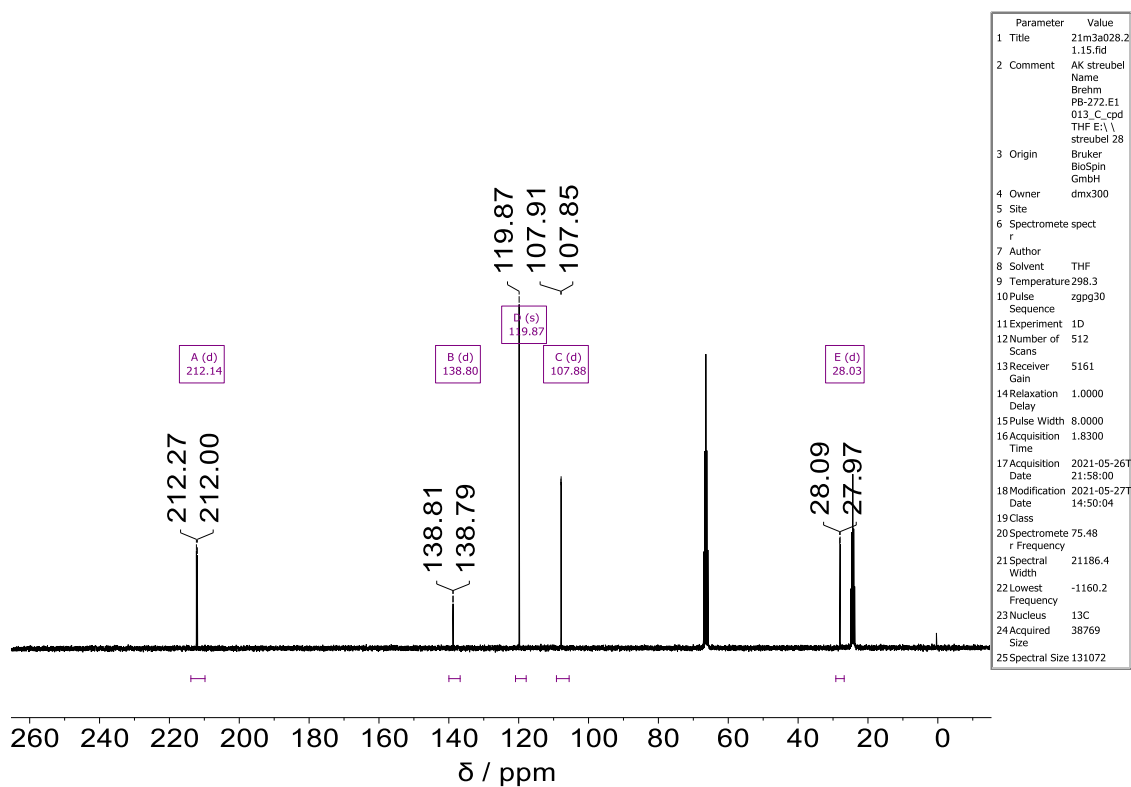

| Parameter       | Value       |
|-----------------|-------------|
| 1 Title         | 21m3a028.2  |
| 1.15.fid        |             |
| 2 Comment       | AK streubel |
| Name            | Brehm       |
| PB-272.E1       |             |
| 013_C_cp        |             |
| THF E:\         |             |
| streubel 28     |             |
| 3 Origin        | Bruker      |
| BioSpin         |             |
| GmbH            |             |
| 4 Owner         | dmx300      |
| 5 Site          |             |
| 6 Spectromete   | spect       |
| er              |             |
| 7 Author        |             |
| 8 Solvent       | THF         |
| 9 Temperature   | 298.3       |
| 10 Pulse        | zgpg30      |
| Sequence        |             |
| 11 Experiment   | 1D          |
| 12 Number of    | 512         |
| Scans           |             |
| 13 Receiver     | 5161        |
| Gain            |             |
| 14 Relaxation   | 1.0000      |
| Delay           |             |
| 15 Pulse Width  | 8.0000      |
| 16 Acquisition  | 1.8300      |
| Time            |             |
| 17 Acquisition  | 2021-05-26T |
| Date            | 21:58:00    |
| 18 Modification | 2021-05-27T |
| Date            | 14:50:04    |
| 19 Class        |             |
| 20 Spectromete  | 75.48       |
| er              |             |
| Frequency       |             |
| 21 Spectral     | 21186.4     |
| Width           |             |
| 22 Lowest       | -1160.2     |
| Frequency       |             |
| 23 Nucleus      | $^{13}C$    |
| 24 Acquired     | 38769       |
| Size            |             |
| 25 Spectral     | 131072      |
| Size            |             |

Figure 17  $^{13}C\{^1H\}$ -NMR spectrum of  $4c^{Fe}$  in THF-d<sub>8</sub>.

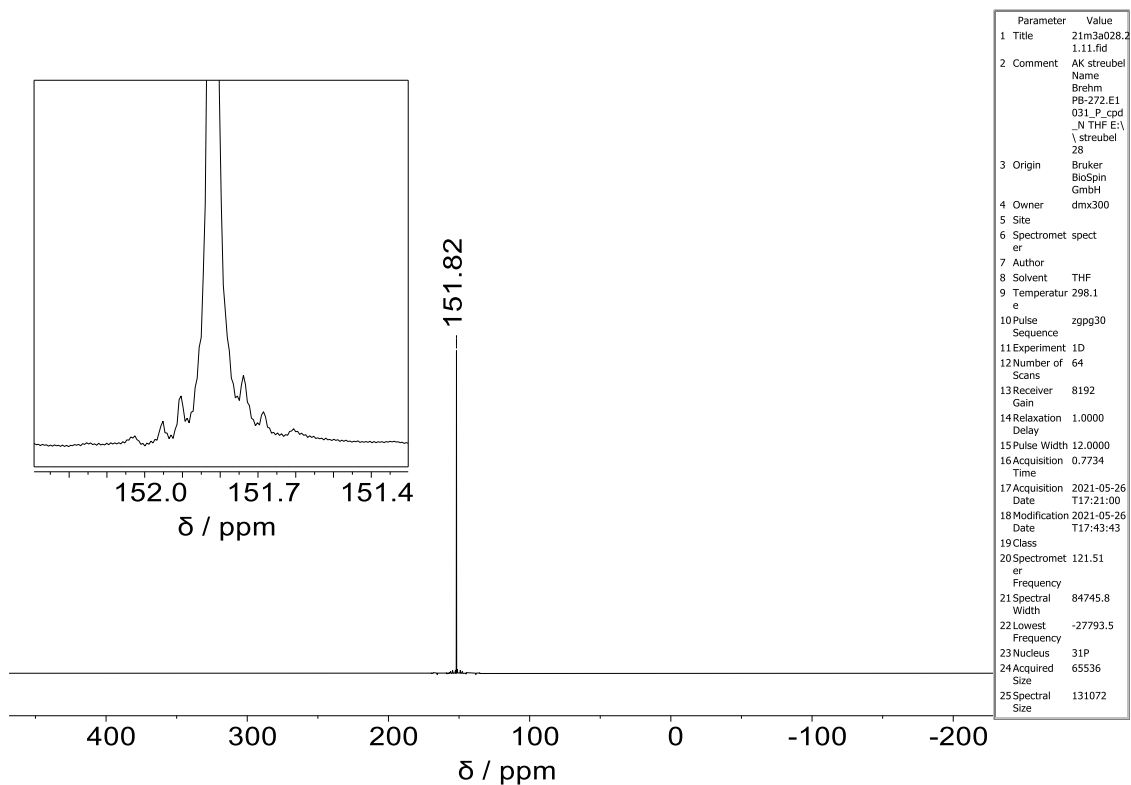

Figure 18  $^{31}\text{P}\{^1\text{H}\}$ -NMR spectrum of  $4c^{\text{Fe}}$  in THF- $d_8$ .

### 5a<sup>Fe</sup>

$^1\text{H}$  NMR (500 MHz,  $\text{C}_6\text{D}_6$ ,  $\delta$ , 374.5 Hz, 1H)  $\delta$  7.92 (d, 1H), 7.17 (d, 1H), 7.16 (d, 1H), 3.38 (m, 1H), 2.46 – 2.30 (m, 7H), 2.04 (d, 1H), 0.88 (d, 3H), 0.87 (d, 3H), 0.71 (d, 3H), 0.70 (d, 3H).

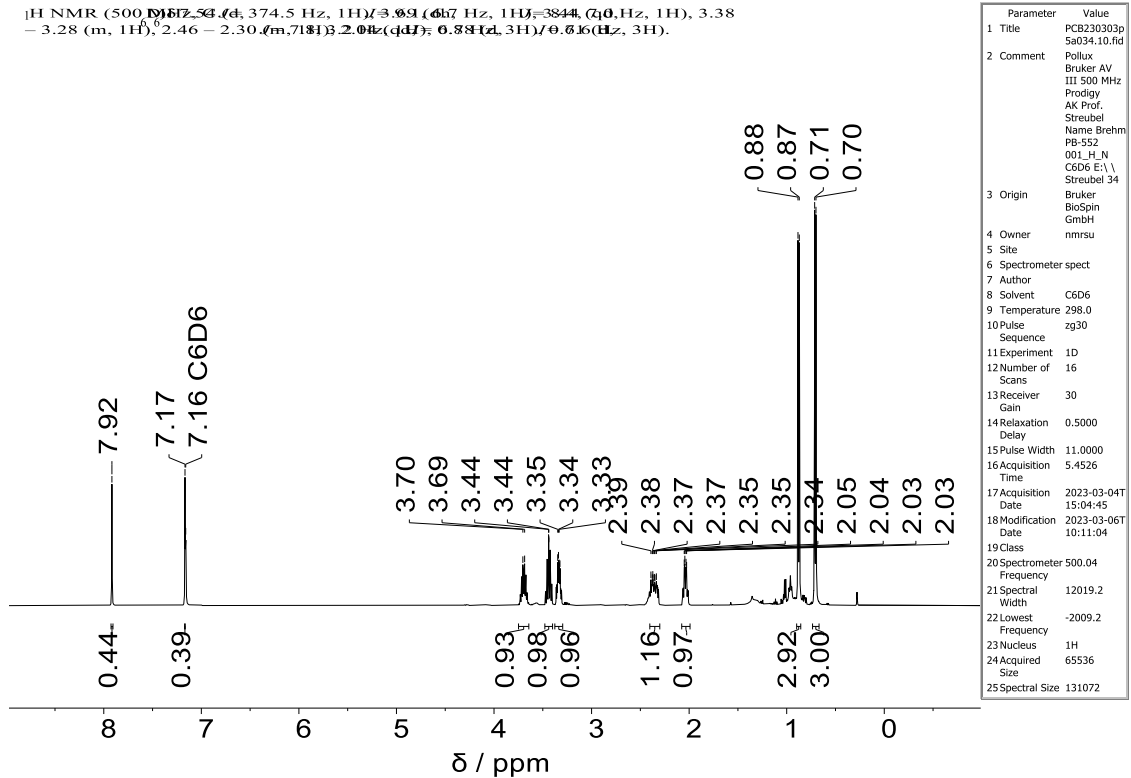

Figure 19  $^1\text{H}$ -NMR spectrum of  $5a^{\text{Fe}}$  in  $\text{C}_6\text{D}_6$ .

$^{13}\text{C}$  NMR (126 MHz,  $\text{C}_6\text{D}_6$ )  $\delta$ : 212.74 (d, 2.1 Hz), 212.57 (d, 2.1 Hz), 131.86 (d, 1.2 Hz), 67.90 (d, 1.2 Hz), 67.82 (d, 1.2 Hz), 40.49 (d, 2.1 Hz), 40.48 (d, 2.1 Hz), 21.34 (d, 1.2 Hz), 19.36 (d, 1.2 Hz), 19.34 (d, 1.2 Hz).

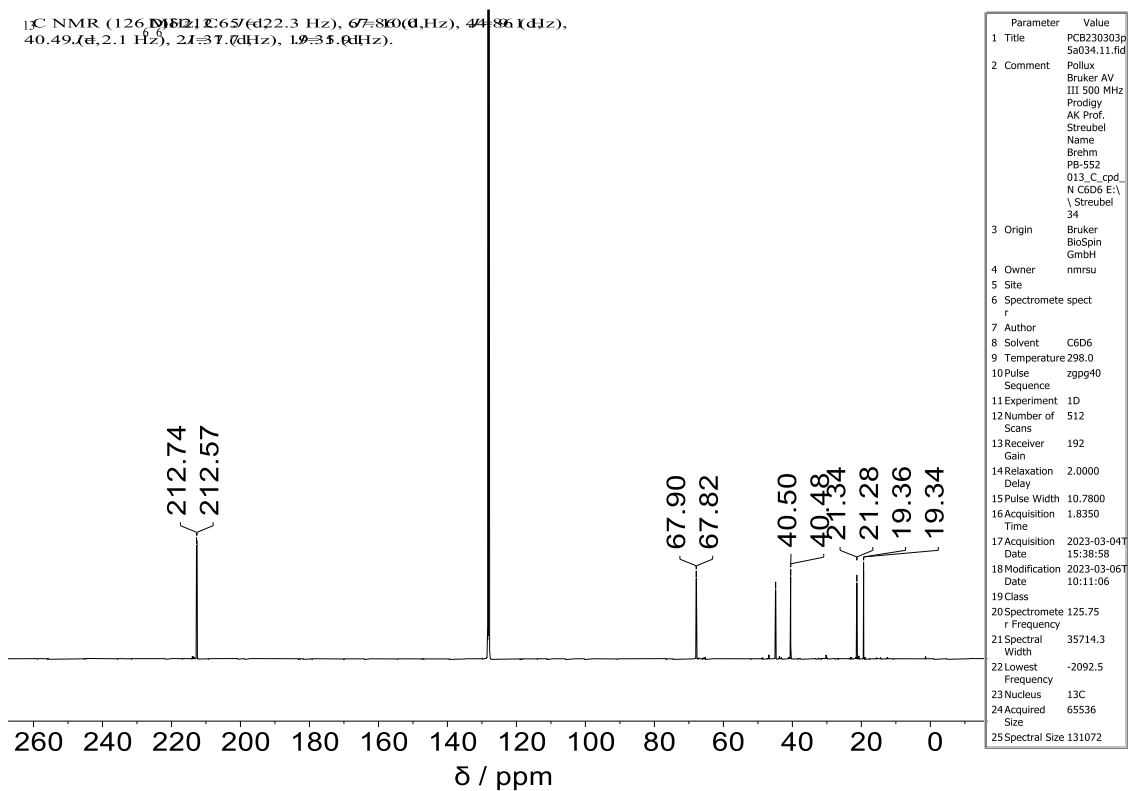

Figure 20  $^{13}\text{C}\{^1\text{H}\}$ -NMR spectrum of  $5a^{\text{Fe}}$  in  $\text{C}_6\text{D}_6$ .

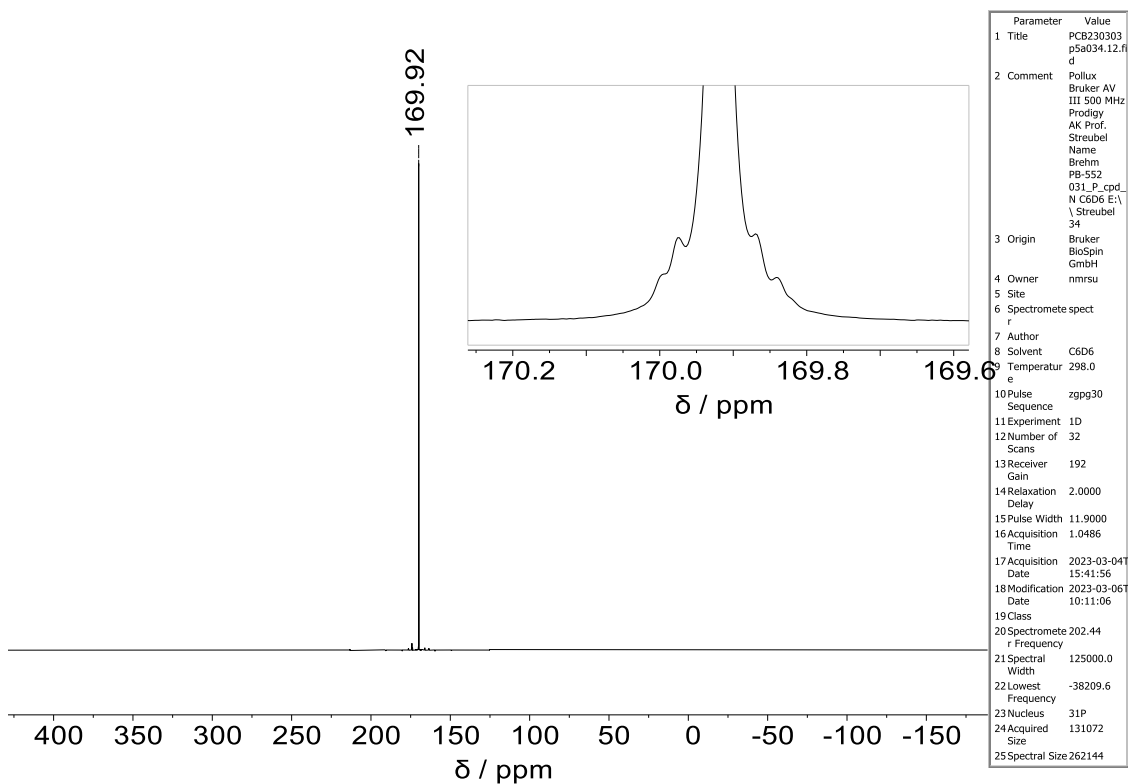

Figure 21  $^{31}\text{P}\{^1\text{H}\}$ -NMR spectrum of  $5a^{\text{Fe}}$  in  $\text{C}_6\text{D}_6$ .

5b<sup>Fe</sup>

<sup>1</sup>H NMR (400 MHz, C<sub>6</sub>D<sub>6</sub>) δ: 7.82 (d, 3H, J = 8.1 Hz), 7.16 (d, 3H, J = 8.1 Hz), 6.86 (s, 1H), 3.45 (s, 3H), 2.25 (d, 2H), 2.22 (d, 2H), 2.00 (s, 1H), 1.99 (s, 1H).

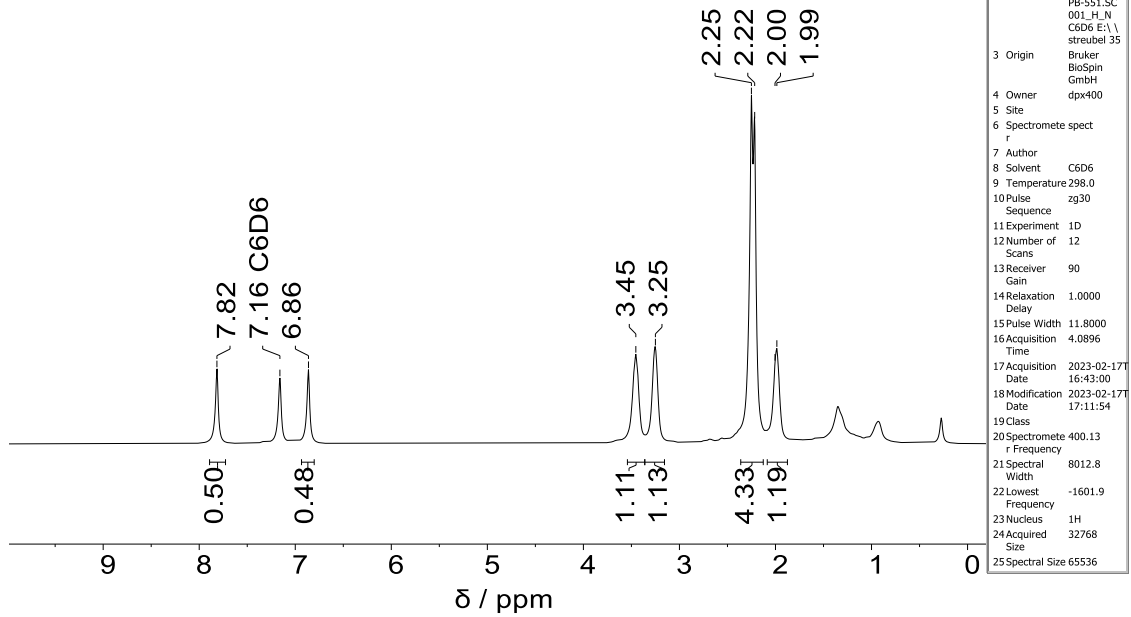

Figure 22 <sup>1</sup>H-NMR spectrum of 5b<sup>Fe</sup> in C<sub>6</sub>D<sub>6</sub>.

<sup>13</sup>C NMR (126 MHz, C<sub>6</sub>D<sub>6</sub>) δ: 212.56, 212.38, 69.29 – 67.70 (m), 50.77, 31.97.

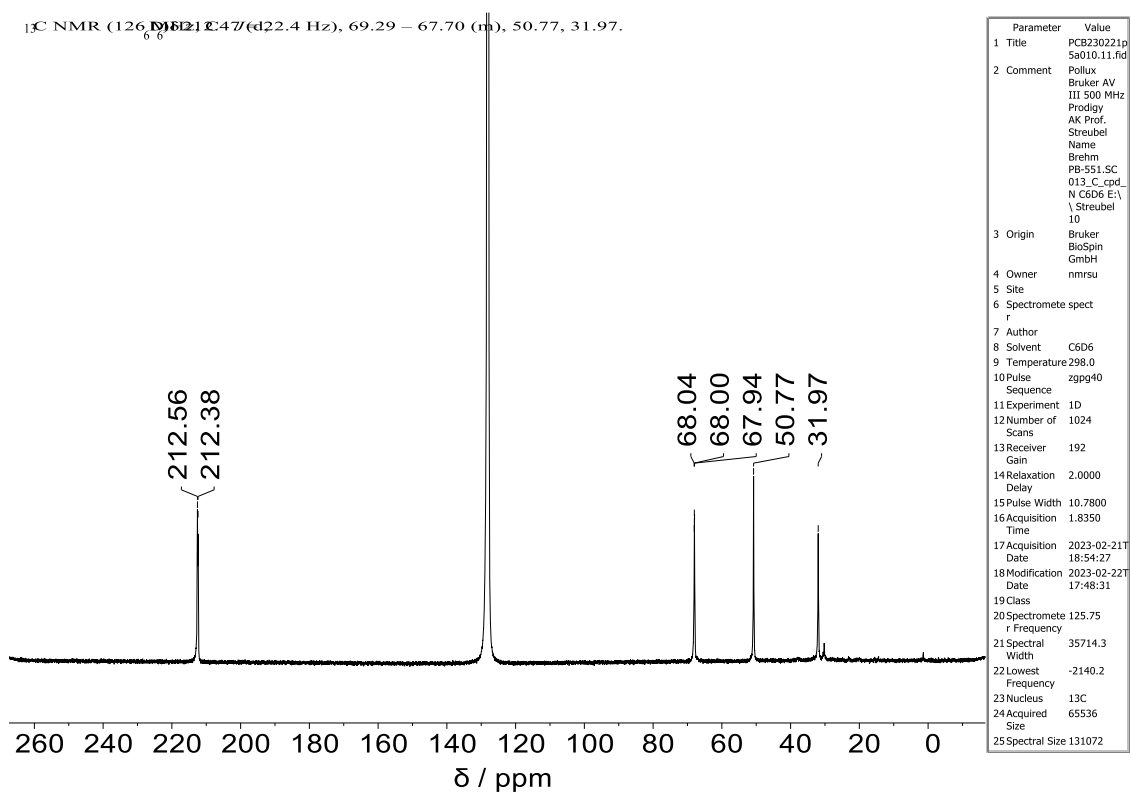

Figure 23 <sup>13</sup>C[<sup>1</sup>H]-NMR spectrum of 5b<sup>Fe</sup> in C<sub>6</sub>D<sub>6</sub>.

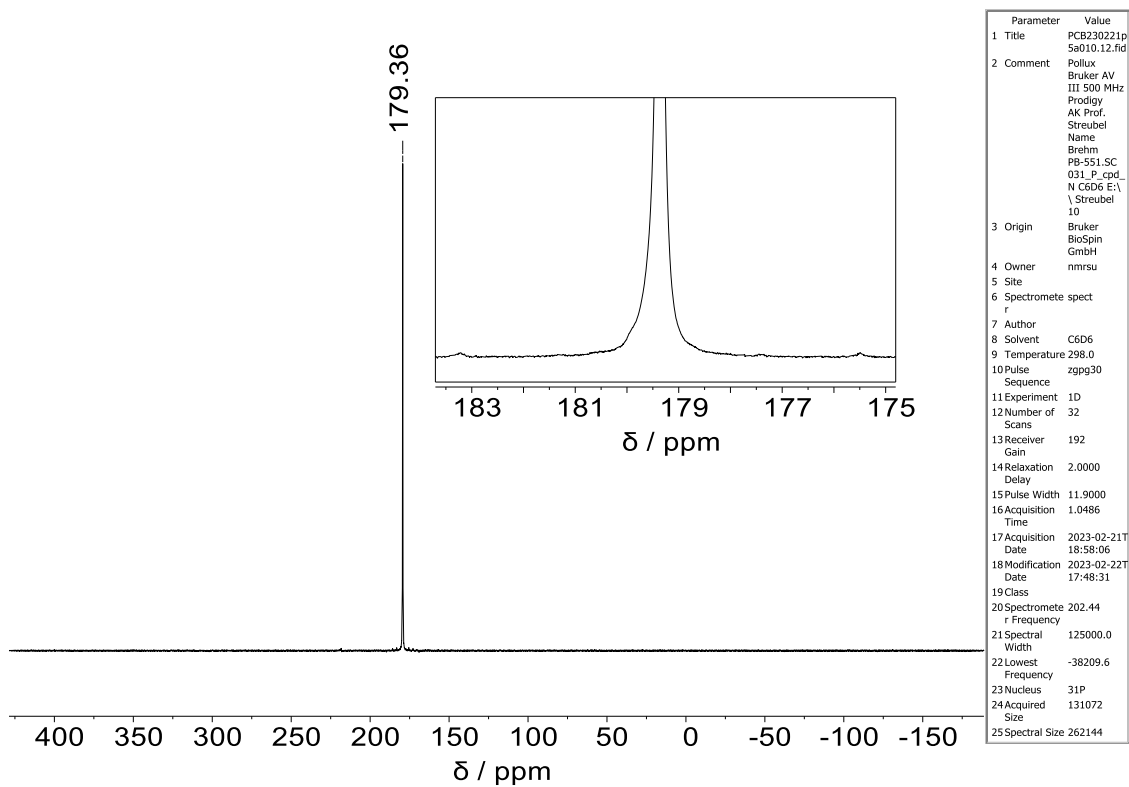

Figure 24  $^{31}\text{P}\{^1\text{H}\}$ -NMR spectrum of  $5b^{\text{Fe}}$  in  $\text{C}_6\text{D}_6$ .

$6b^{\text{Fe}}$

$^1\text{H}$  NMR (500 MHz,  $\text{C}_6\text{D}_6$ , 409.3 Hz, 1H), 0.95 (s, 6H), 0.70 (s, 6H).

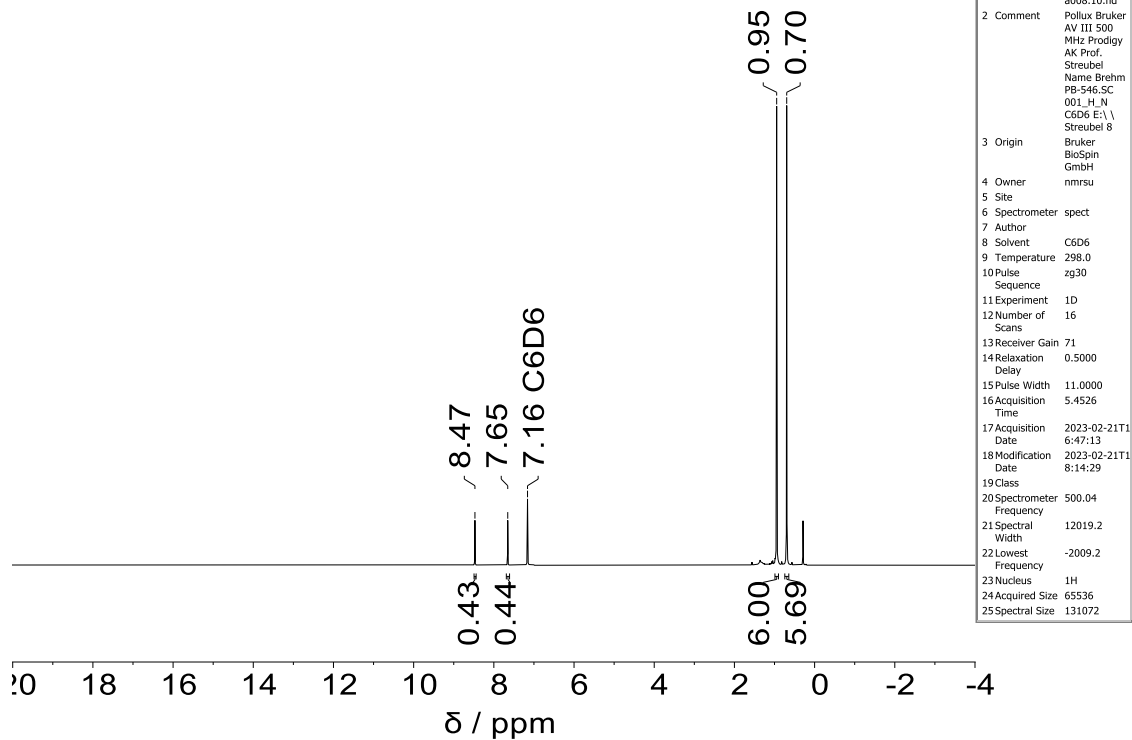

Figure 25  $^1\text{H}$ -NMR spectrum of  $6b^{\text{Fe}}$  in  $\text{C}_6\text{D}_6$ .



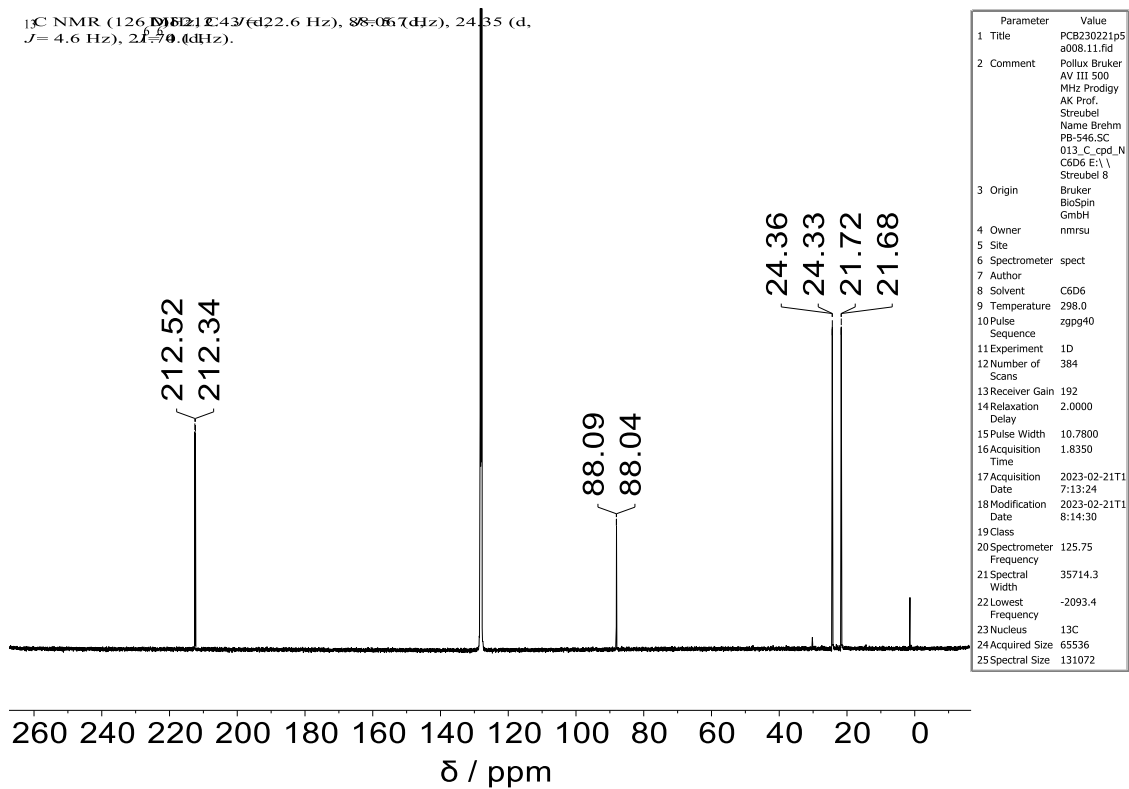

Figure 26  $^{13}\text{C}\{^1\text{H}\}$ -NMR spectrum of  $6b^{\text{Fe}}$  in  $\text{C}_6\text{D}_6$ .

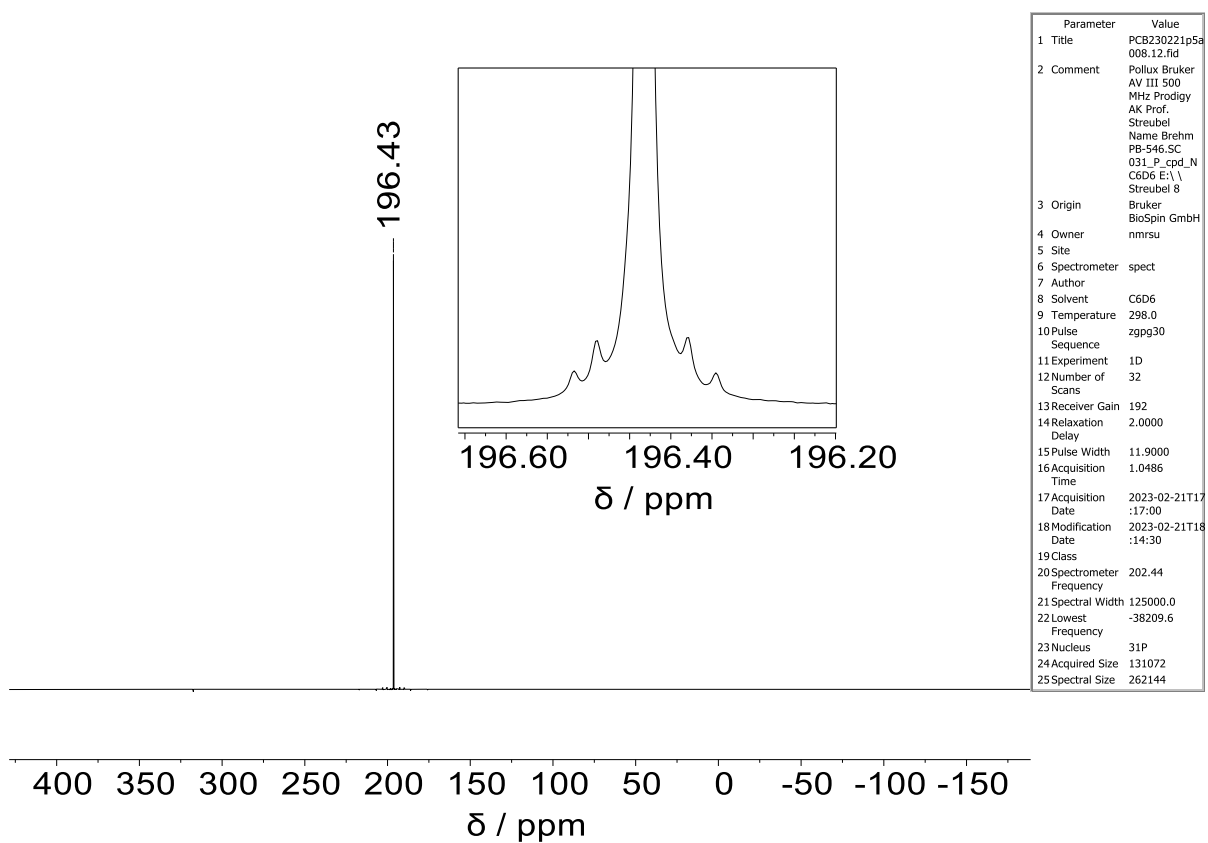

Figure 27  $^{31}\text{P}\{^1\text{H}\}$ -NMR spectrum of  $6b^{\text{Fe}}$  in  $\text{C}_6\text{D}_6$ .



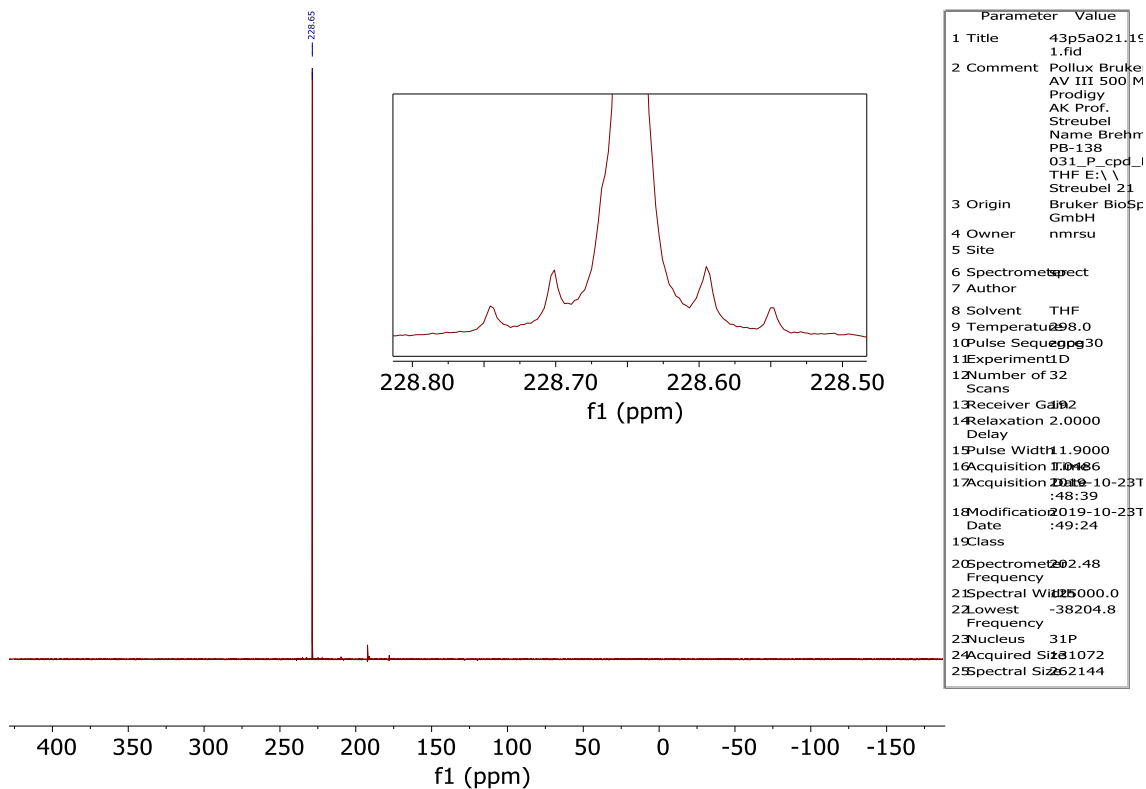

Figure 30  $^{31}\text{P}\{^1\text{H}\}$ -NMR spectrum of  $6c^{\text{Fe}}$  in  $\text{C}_6\text{D}_6$ .

7

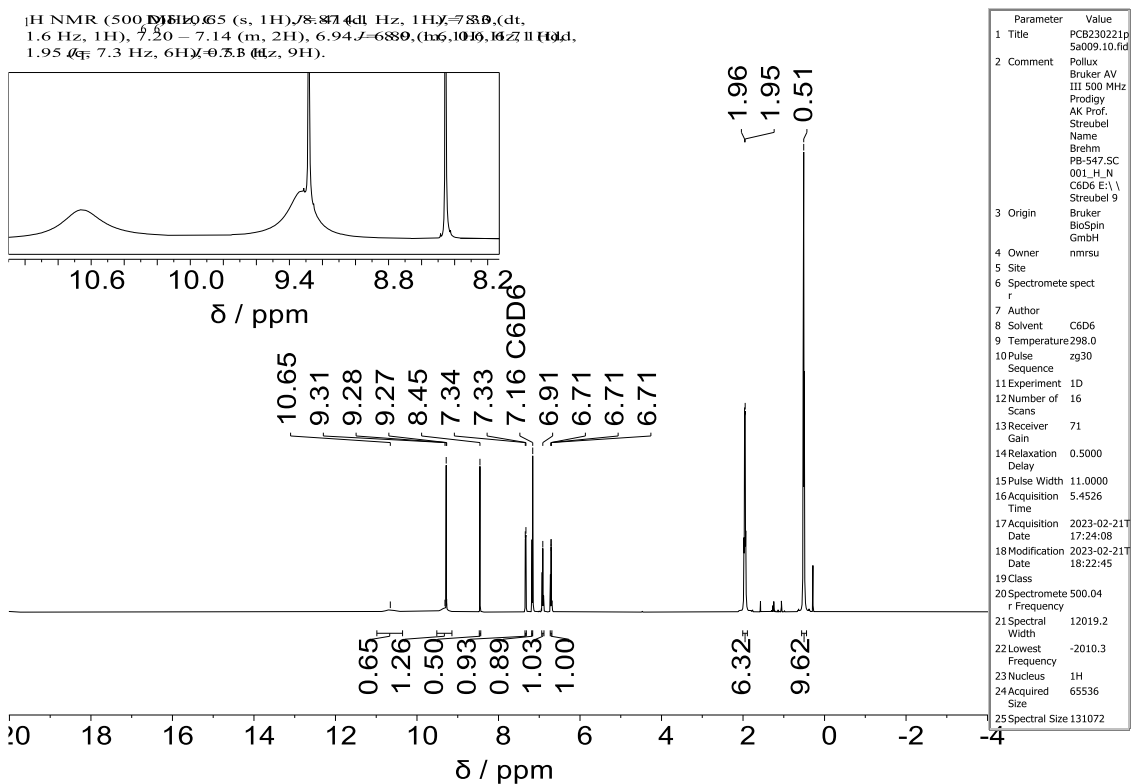

Figure 31  $^1\text{H}$ -NMR spectrum of  $7$  in  $\text{C}_6\text{D}_6$ .

$^{13}\text{C}$  NMR (126 MHz,  $\text{C}_6\text{D}_6$ )  $\delta$ : 215.74 (d), 215.56 (d), 149.32 (d), 149.29 (d), 145.20 (d), 125.85 (d), 125.84 (d), 123.32 (d), 123.28 (d), 120.75 (d), 120.74 (d), 118.25 (d), 118.24 (d), 45.50 (d), 8.06 (d).

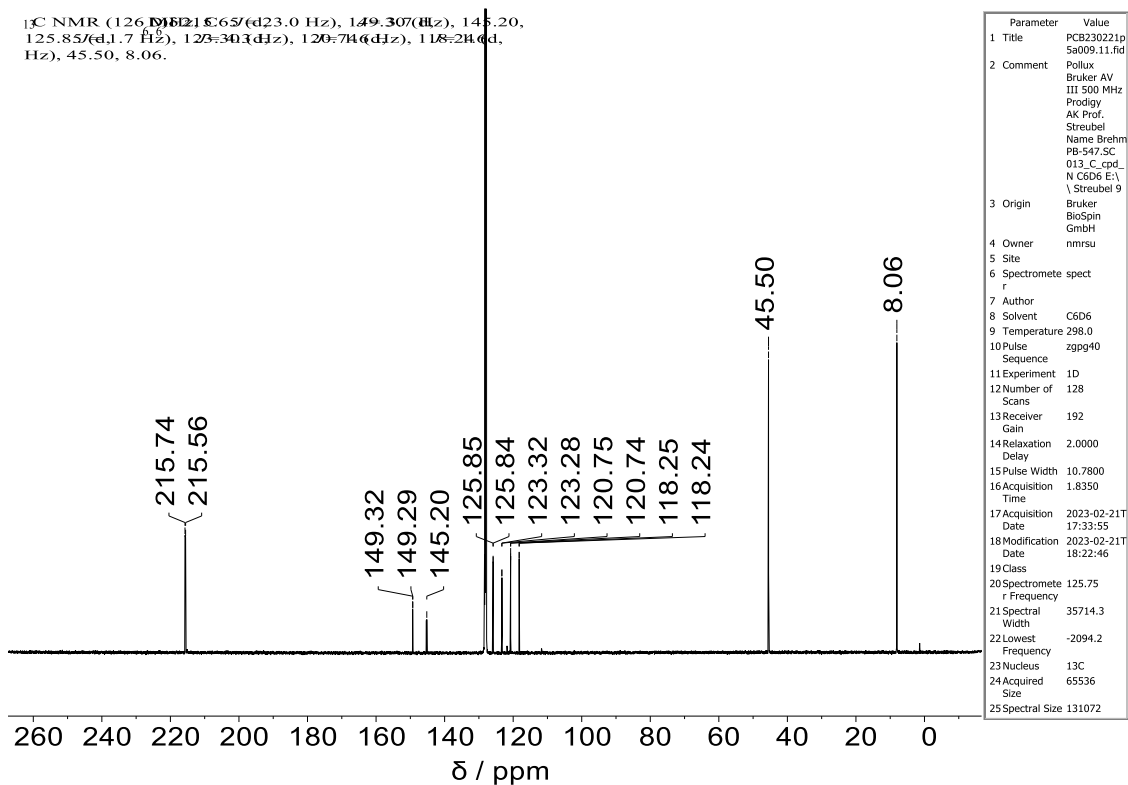

Figure 32  $^{13}\text{C}\{^1\text{H}\}$ -NMR spectrum of **7** in  $\text{C}_6\text{D}_6$ .

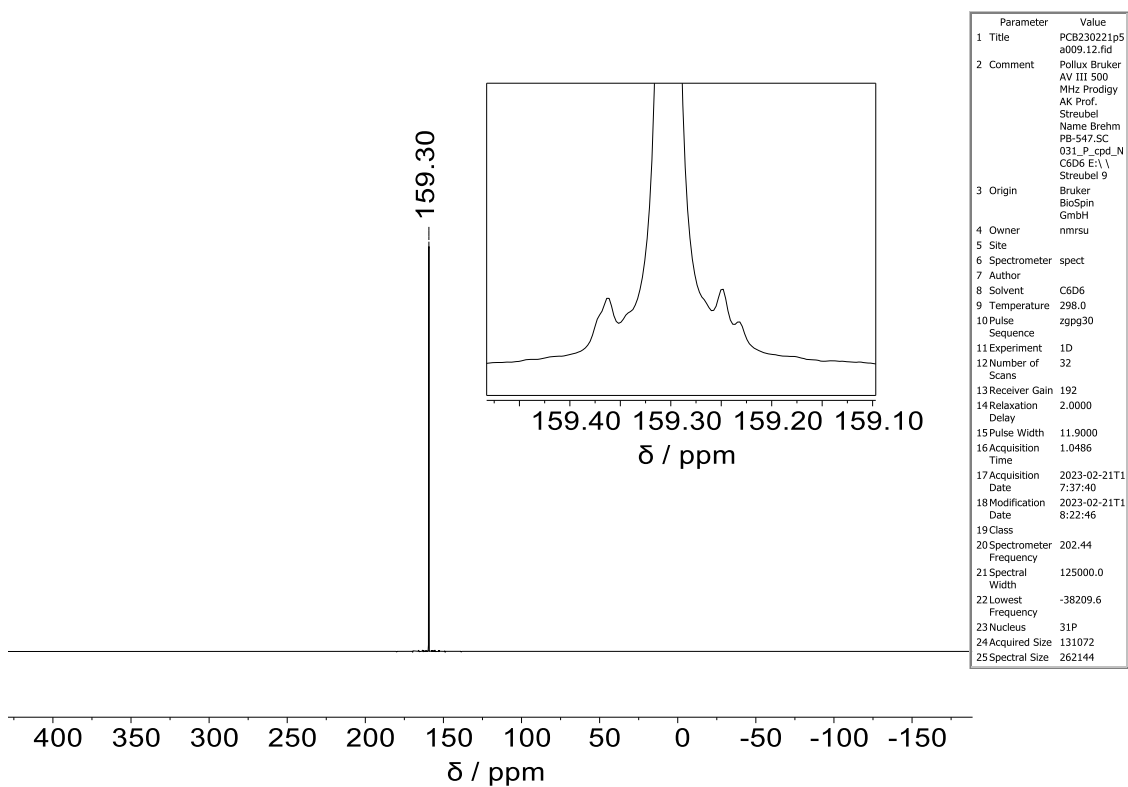

Figure 33  $^{31}\text{P}\{^1\text{H}\}$ -NMR spectrum of **7** in  $\text{C}_6\text{D}_6$ .

Single crystal X-ray diffraction studies of  
**1b<sup>Fe</sup>**

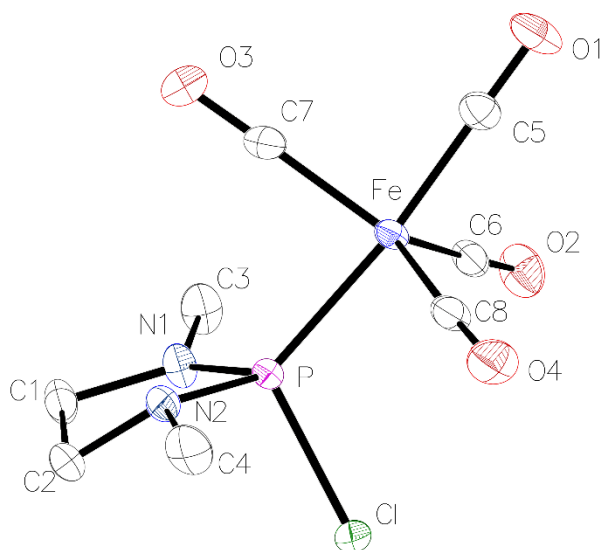

|                                    |                                                                      |                                             |                                                               |
|------------------------------------|----------------------------------------------------------------------|---------------------------------------------|---------------------------------------------------------------|
| Crystal Habitus                    | clear light yellow block                                             | Crystal size/mm <sup>3</sup>                | 0.2 × 0.15 × 0.12                                             |
| Device Type                        | STOE STADIVARI                                                       | Absorption correction                       | multi-scan                                                    |
| Empirical formula                  | C <sub>8</sub> H <sub>10</sub> ClFeN <sub>2</sub> O <sub>4</sub> P   | Tmin; Tmax                                  | 1.0000; 1.0000                                                |
| Moiety formula                     | C <sub>8</sub> H <sub>10</sub> Cl Fe N <sub>2</sub> O <sub>4</sub> P | Radiation                                   | MoKα (λ = 0.71073)                                            |
| Formula weight                     | 320.45                                                               | 2θ range for data collection/°              | 5.788 to 61.59°                                               |
| Temperature/K                      | 120.0                                                                | Completeness to theta                       | 1.000                                                         |
| Crystal system                     | monoclinic                                                           | Index ranges                                | -9 ≤ h ≤ 9, -9 ≤ k ≤ 9, -20 ≤ l ≤ 20                          |
| Space group                        | Pc                                                                   | Reflections collected                       | 14397                                                         |
| a/Å                                | 6.9354(6)                                                            | Independent reflections                     | 3349 [R <sub>int</sub> = 0.0155, R <sub>sigma</sub> = 0.0151] |
| b/Å                                | 6.4697(10)                                                           | Data/restraints/parameters                  | 3349/2/156                                                    |
| c/Å                                | 14.1938(17)                                                          | Goodness-of-fit on F <sup>2</sup>           | 1.049                                                         |
| α/°                                | 90                                                                   | Final R indexes [I ≥ 2σ (I)]                | R <sub>1</sub> = 0.0189, wR <sub>2</sub> = 0.0420             |
| β/°                                | 97.364(8)                                                            | Final R indexes [all data]                  | R <sub>1</sub> = 0.0210, wR <sub>2</sub> = 0.0429             |
| γ/°                                | 90                                                                   | Largest diff. peak/hole / e Å <sup>-3</sup> | 0.25/-0.28                                                    |
| Volume/Å <sup>3</sup>              | 631.62(14)                                                           | Flack parameter                             | -0.004(6)                                                     |
| Z                                  | 2                                                                    | CCDC Deposition Number                      | 2350418                                                       |
| ρ <sub>calc</sub> /cm <sup>3</sup> | 1.685                                                                |                                             |                                                               |
| μ/mm <sup>-1</sup>                 | 1.534                                                                |                                             |                                                               |
| F(000)                             | 324.0                                                                |                                             |                                                               |

4c<sup>Fe</sup>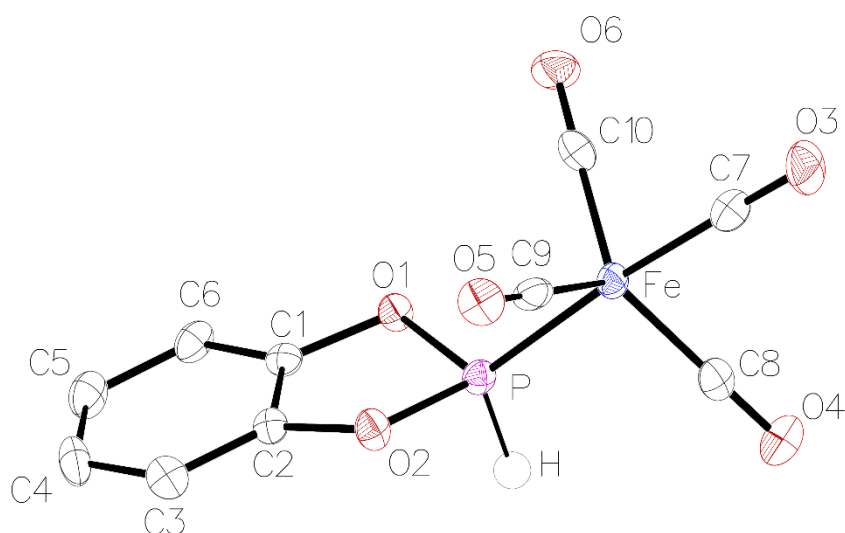

|                                    |                                                    |                                             |                                                               |
|------------------------------------|----------------------------------------------------|---------------------------------------------|---------------------------------------------------------------|
| Crystal Habitus                    | clear colourless plate                             | Crystal size/mm <sup>3</sup>                | 0.35 × 0.26 × 0.08                                            |
| Device Type                        | Bruker X8-KappaApexII                              | Absorption correction                       | empirical                                                     |
| Empirical formula                  | C <sub>10</sub> H <sub>5</sub> O <sub>6</sub> PFe  | Tmin; Tmax                                  | 0.5417; 0.7461                                                |
| Moiety formula                     | C <sub>10</sub> H <sub>5</sub> Fe O <sub>6</sub> P | Radiation                                   | MoKα (λ = 0.71073)                                            |
| Formula weight                     | 307.96                                             | 2θ range for data collection/°              | 7.572 to 50.46°                                               |
| Temperature/K                      | 100                                                | Completeness to theta                       | 0.995                                                         |
| Crystal system                     | orthorhombic                                       | Index ranges                                | -18 ≤ h ≤ 19, -12 ≤ k ≤ 12, -8 ≤ l ≤ 5                        |
| Space group                        | Pca <sub>21</sub>                                  | Reflections collected                       | 7821                                                          |
| a/Å                                | 16.151(2)                                          | Independent reflections                     | 1918 [R <sub>int</sub> = 0.0646, R <sub>sigma</sub> = 0.0551] |
| b/Å                                | 10.4300(12)                                        | Data/restraints/parameters                  | 1918/1/166                                                    |
| c/Å                                | 6.8190(8)                                          | Goodness-of-fit on F <sup>2</sup>           | 1.024                                                         |
| α/°                                | 90                                                 | Final R indexes [I >= 2σ (I)]               | R <sub>1</sub> = 0.0345, wR <sub>2</sub> = 0.0702             |
| β/°                                | 90                                                 | Final R indexes [all data]                  | R <sub>1</sub> = 0.0400, wR <sub>2</sub> = 0.0725             |
| γ/°                                | 90                                                 | Largest diff. peak/hole / e Å <sup>-3</sup> | 0.37/-0.24                                                    |
| Volume/Å <sup>3</sup>              | 1148.7(2)                                          | Flack parameter                             | 0.01(2)                                                       |
| Z                                  | 4                                                  | CCDC Deposition Number                      | 2350419                                                       |
| ρ <sub>calc</sub> /cm <sup>3</sup> | 1.781                                              |                                             |                                                               |
| μ/mm <sup>-1</sup>                 | 1.467                                              |                                             |                                                               |
| F(000)                             | 616.0                                              |                                             |                                                               |



6C<sup>Fe</sup>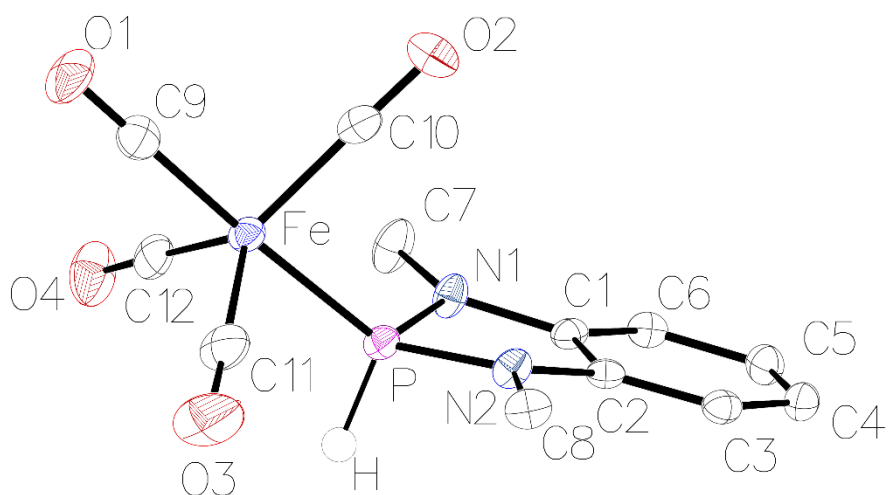

|                                    |                                                                    |                                             |                                                               |
|------------------------------------|--------------------------------------------------------------------|---------------------------------------------|---------------------------------------------------------------|
| Crystal Habitus                    | clear brownish colourless block                                    | Crystal size/mm <sup>3</sup>                | 0.12 × 0.1 × 0.09                                             |
| Device Type                        | STOE IPDS-2T                                                       | Absorption correction                       | integration                                                   |
| Empirical formula                  | C <sub>12</sub> H <sub>11</sub> FeN <sub>2</sub> O <sub>4</sub> P  | Tmin; Tmax                                  | 0.6213; 0.9091                                                |
| Moiety formula                     | C <sub>12</sub> H <sub>11</sub> Fe N <sub>2</sub> O <sub>4</sub> P | Radiation                                   | MoKα (λ = 0.71073)                                            |
| Formula weight                     | 334.05                                                             | 2θ range for data collection/°              | 5.334 to 50.5°                                                |
| Temperature/K                      | 123                                                                | Completeness to theta                       | 0.999                                                         |
| Crystal system                     | trigonal                                                           | Index ranges                                | -22 ≤ h ≤ 22, -22 ≤ k ≤ 22, -24 ≤ l ≤ 24                      |
| Space group                        | R-3                                                                | Reflections collected                       | 20708                                                         |
| a/Å                                | 19.0115(5)                                                         | Independent reflections                     | 2584 [R <sub>int</sub> = 0.1008, R <sub>sigma</sub> = 0.0473] |
| b/Å                                | 19.0115(5)                                                         | Data/restraints/parameters                  | 2584/0/187                                                    |
| c/Å                                | 20.4834(6)                                                         | Goodness-of-fit on F <sup>2</sup>           | 0.940                                                         |
| α/°                                | 90                                                                 | Final R indexes [I >= 2σ(I)]                | R <sub>1</sub> = 0.0236, wR <sub>2</sub> = 0.0547             |
| β/°                                | 90                                                                 | Final R indexes [all data]                  | R <sub>1</sub> = 0.0332, wR <sub>2</sub> = 0.0563             |
| γ/°                                | 120                                                                | Largest diff. peak/hole / e Å <sup>-3</sup> | 0.40/-0.32                                                    |
| Volume/Å <sup>3</sup>              | 6411.6(4)                                                          |                                             |                                                               |
| Z                                  | 18                                                                 |                                             |                                                               |
| ρ <sub>calc</sub> /cm <sup>3</sup> | 1.557                                                              |                                             |                                                               |
| μ/mm <sup>-1</sup>                 | 1.183                                                              | CCDC Deposition Number                      | 2350420                                                       |
| F(000)                             | 3060.0                                                             |                                             |                                                               |
